1 Title page  
2  
3 Assessing mitochondrial function in angiosperms with highly divergent mitochondrial genomes  
4  
5 Justin C. Havird<sup>1,2\*</sup>, Gregory R. Noe<sup>1</sup>, Luke Link<sup>1</sup>, Amber Torres<sup>1</sup>, David C. Logan<sup>3</sup>, Daniel B. Sloan<sup>1</sup>,  
6 Adam J. Chicco<sup>4</sup>  
7  
8 <sup>1</sup>Department of Biology, Colorado State University, Fort Collins, CO, USA  
9 <sup>2</sup>Department of integrative Biology, The University of Texas, Austin, TX, USA  
10 <sup>3</sup>IRHS, Université d'Angers, INRA, AGROCAMPUS-Ouest, SFR 4207 QUASAV, 49071 Beaucouzé  
11 cedex, France  
12 <sup>4</sup>Department of Biomedical Sciences, Colorado State University, Fort Collins, CO, USA  
13  
14 Email addresses: [jhavird@utexas.edu](mailto:jhavird@utexas.edu), [gregrnoe@gmail.com](mailto:gregrnoe@gmail.com), [lukeylink@gmail.com](mailto:lukeylink@gmail.com),  
15 [marikat@rams.colostate.edu](mailto:marikat@rams.colostate.edu), [dclogan@mac.com](mailto:dclogan@mac.com), [dbsloan@rams.colostate.edu](mailto:dbsloan@rams.colostate.edu),  
16 [Adam.Chicco@colostate.edu](mailto:Adam.Chicco@colostate.edu)  
17  
18 \*Corresponding author personal phone: 352-870-3412  
19  
20 Date of submission: 20 October 2018  
21  
22 Number of tables: 2  
23  
24 Number of figures: 6 (all color online-only)  
25  
26 Number of words: 6479  
27  
28 Number of supplementary tables: 2  
29  
30 Number of supplementary figures: 7  
31  
32 Number of supplementary videos: 2  
33  
34  
35  
36  
37  
38  
39  
40  
41  
42  
43  
44  
45  
46  
47  
48  
49  
50  
51

52 **Title:** Assessing mitochondrial function in angiosperms with highly divergent mitochondrial genomes

53

54 **Running title:** Mitochondrial function in angiosperms with odd mitogenomes

55

56 **Highlight**

57 Species in *Silene* with highly unusual mitochondrial genomes were found to have generally  
58 typical mitochondrial function and show intra- and interspecific variation using a novel mitochondrial  
59 respiration protocol.

60

61 **Abstract**

62

63 Angiosperm mitochondrial (mt) genes are generally slow-evolving, but multiple lineages have undergone  
64 dramatic accelerations in rates of nucleotide substitution and extreme changes in mt genome structure.

65 While molecular evolution in these lineages has been investigated, very little is known about their mt  
66 function. Here, we develop a new protocol to characterize respiration in isolated plant mitochondria and  
67 apply it to species of *Silene* with mt genomes that are rapidly evolving, highly fragmented, and  
68 exceptionally large (~11 Mbp). This protocol, complemented with traditional measures of plant fitness,  
69 cytochrome c oxidase activity assays, and fluorescence microscopy, was used to characterize inter- and  
70 intraspecific variation in mt function. Contributions of the individual “classic” OXPHOS complexes, the  
71 alternative oxidase, and external NADH dehydrogenases to overall mt respiratory flux were found to be  
72 similar to previously studied angiosperms with more typical mt genomes. Some differences in mt function  
73 could be explained by inter- and intraspecific variation, possibly due to local adaptation or environmental  
74 effects. Although this study suggests that these *Silene* species with peculiar mt genomes still show  
75 relatively normal mt function, future experiments utilizing the protocol developed here can explore such  
76 questions in a more detailed and comparative framework.

77

78 **Keywords:** alternative NADH dehydrogenase, cytonuclear interactions, flux control factor, mitochondrial  
79 respiration, Oroboros Oxygraph 2K, SUI protocol

80

81 **Abbreviations:** ABR/SEN/KEWI/KEWJ, *S. conica* accessions used here; AOX, alternative oxidase;  
82 ASC, ascorbate; BSA, bovine serum albumin, CI-CV, Complexes I-V; COX, cytochrome c oxidase;  
83 CytC, cytochrome c; DH<sub>in</sub> and DH<sub>ex</sub>, internal and external NADH dehydrogenases; ETS, electron transfer  
84 system; FCFs, flux control factors; mt, mitochondrial; OXPHOS, oxidative phosphorylation; nPG, n-  
85 propyl gallate; O2K, Oxygraph 2K; RCR, respiratory control ratio; ROT, rotenone; SUCC, succinate;  
86 TMPD, tetramethylphenylenediamine; TMRM, tetramethylrhodamine methyl ester

87

## 88 Introduction

89  
90 Nearly all eukaryotes rely on mitochondria to supply the energy necessary for cellular function.  
91 Oxidative phosphorylation (OXPHOS) is the primary mechanism whereby mitochondria convert nutrients  
92 into cellular energy in the form of ATP. Energy conversion is accomplished via passing electrons from  
93 oxidized metabolic substrates, donated by high-energy reducing equivalents such as NADH, through a  
94 series of multisubunit protein complexes comprising an electron transfer system (ETS; a.k.a., electron  
95 transport chain; Fig. 1A). The resulting electron transfers generate a proton motive force across the inner  
96 mt membrane that is harnessed by ATP synthase to phosphorylate ADP. In many eukaryotes, oxygen acts  
97 as a terminal electron acceptor at cytochrome *c* oxidase (COX; Complex IV, CIV), resulting in a  
98 “coupling” of oxygen consumption and ATP synthesis. Accordingly, oxygen consumption by isolated  
99 mitochondria in the presence of ADP is routinely used as a proxy for OXPHOS function in diverse taxa  
100 (Balaban, 1990; Wilson *et al.*, 1988; Chung *et al.*, 2018; Haider *et al.*, 2018;). ETS complex-specific  
101 substrates and inhibitors are also used to assess how different sites of electron entry exert control over  
102 OXPHOS function (Gnaiger, 2005). For example, rotenone (ROT) specifically inhibits Complex I (CI),  
103 allowing its contribution to total mt respiration to be parsed from other ETS complexes.

104 Such mt respirometry methods have been utilized in plants for decades (Ikuma and Bonner, 1967;  
105 Douce *et al.*, 1977; Day *et al.*, 1985). Many aspects of mt respiration in plants differ from mammals,  
106 making angiosperms useful study systems to understand OXPHOS (Affourtit *et al.*, 2001; Millar *et al.*,  
107 2011; Jacoby *et al.*, 2012). For example, although the mt ETS is more simplified than its bacterial  
108 ancestors (Berry, 2003), plant mitochondria contains a terminal alternative oxidase (AOX) not present in  
109 mammals (Fig. 1A). The AOX competes with CIV for electrons but does not result in proton  
110 translocation (Siedow and Girvin, 1980; Finnegan *et al.*, 2004). Rather, AOX plays a role in preventing  
111 formation of reactive oxygen species and limiting oxidative stress (Siedow and Girvin, 1980; Considine *et al.*,  
112 2002; Fiorani *et al.*, 2005; Watanabe *et al.*, 2008). Alternative NADH dehydrogenases (i.e., internal  
113 and external NADH dehydrogenases, DH<sub>in</sub> and DH<sub>ex</sub>; Fig. 1A), the coordination and balance of mt  
114 OXPHOS with photosynthesis, and the process of “photorespiration” also make plants interesting models  
115 to investigate mt function. However, such studies have largely used classic plant models such as  
116 *Arabidopsis*.

117 Of particular interest is the recent description of independent angiosperm lineages displaying  
118 abnormal patterns of mt genome evolution and structure (Mower *et al.*, 2007; Sanchez-Puerta *et al.*,  
119 2017). In most angiosperms, mt genomes evolve slowly compared to the nuclear genome (Wolfe *et al.*,  
120 1987), whereas mammals show the opposite pattern (Brown *et al.*, 1979). However, several independent  
121 angiosperm lineages have undergone recent and rapid accelerations in mtDNA evolution, resulting in a  
122 more animal-like balance between mt and nuclear substitution rates (Cho *et al.*, 2004; Parkinson *et al.*,  
123 2005; Mower *et al.*, 2007; Sloan *et al.*, 2012a). Moreover, while most angiosperms mt genomes can be  
124 mapped as a single “master circle” chromosome (as in most eukaryotes)(Mower *et al.*, 2012; Gualberto  
125 and Newton, 2017), multi-chromosomal mt genomes have also been found in several independent  
126 lineages (Alverson *et al.*, 2011; Sloan *et al.*, 2012a; Rice *et al.*, 2013; Shearman *et al.*, 2016; Sanchez-  
127 Puerta *et al.*, 2017).

128 Recent evidence suggests that unusual angiosperm mt genomes can be associated with altered mt  
129 function. For example, the parasitic plant *Viscum* exhibits highly accelerated evolutionary rates, altered  
130 structure, and gene loss in its mt genome (Skippington *et al.*, 2015, 2017) and was recently shown to: 1)  
131 have lost CI, 2) rely heavily on AOX and alternative NADH dehydrogenases, 3) have reduced  
132 abundances of all OXPHOS complexes, and 4) have an altered ETS configuration (Maclean *et al.*, 2018;  
133 Senkler *et al.*, 2018).

134 Certain species in the genus *Silene* are exemplars of angiosperm lineages with odd mt genomes,  
135 displaying: 1) accelerated rates of mt genome evolution (Mower *et al.*, 2007; Sloan *et al.*, 2009; Sloan *et al.*,  
136 2012a; Sloan *et al.*, 2012b), 2) several dozen circular mt chromosomes (Sloan *et al.*, 2012a; Wu *et al.*,  
137 2015), and 3) large expansions in mt genome size (up to 11 Mb) (Sloan *et al.*, 2012a). While mt  
138 molecular evolution in *Silene* has been investigated thoroughly (Stadler and Delph, 2002; Mower *et al.*,

139 2007; Sloan *et al.*, 2009; Touzet and Delph, 2009; Sloan *et al.*, 2012a; Sloan *et al.*, 2012b; Sloan *et al.*,  
140 2014; Havird *et al.*, 2015; Havird *et al.*, 2017), it is entirely unknown how the curious features of their mt  
141 genomes have affected mt function.

142 Here, we investigate mt function in *Silene* using a novel method to comprehensively evaluate mt  
143 respiration by the sequential titration of multiple OXPHOS substrates and inhibitors in a single sample,  
144 complemented with measurements of plant fitness, COX enzyme activity, and live imaging of  
145 mitochondria. Through these experiments we addressed the following questions: 1) Do species with  
146 unusual mt genomic features have unusual mt function? 2) Does mt respiration show intra- or  
147 interspecific variation in *Silene*? and 3) Do correlations exist among different respiratory fluxes (i.e., a  
148 negative CI:AOX correlation as in *Viscum*), or between mt respiration and metrics of plant fitness?  
149

## 150 **Methods**

### 151 *Silene* acquisition and growth

152 Four accessions of *Silene conica* were used: ABR (Abruzzo, Italy), SEN (Senez, France), KEWI  
153 (Wrocław, Poland, accession #8589), and KEWJ (Hungary, accession #1568) (described in Rockenbach  
154 *et al.*, 2016). The first two were provided by collectors, while the latter two and a single sample of *S.*  
155 *subconica* (Gradevo, Bulgaria, accession #31398) were obtained from the Kew Millennium Seed Bank.  
156 The *S. subconica* accession was originally cataloged as *S. conica* but was morphologically similar to *S.*  
157 *subconica*, and phylogenetic analyses using transcriptomic data placed it with high support as sister to *S.*  
158 *subconica* to the exclusion of 19 *S. conica* populations (Havird *et al.*, 2017). Therefore, we classify it as *S.*  
159 *subconica*. These accessions were propagated through several generations by self-fertilization to obtain  
160 seeds used here.  
161

162 In December 2016, seeds were germinated on soil (Fafard 2SV mix supplemented with  
163 vermiculite and perlite) in SC7 Cone-tainers (Stuewe and Sons) on a mist bench under supplemental  
164 lighting (16-hr/8-hr light/dark cycle) in the Colorado State University greenhouse. Either eight (SEN,  
165 KEWI, and KEWJ), 16 (*S. subconica*), or 24 (ABR) seeds were used per sample. Seeds were obtained  
166 from at least two different parents and were planted in a randomized layout to minimize spatial effects.  
167 Germination success was scored three and four weeks after planting, after which seedlings were  
168 transferred off the mist bench and began to be treated with supplemental watering and fertilizer. Fifteen  
169 weeks after germination, the plants were transferred to 1 gal pots in order to promote vegetative growth.  
170 Plants were then monitored every day until the first flower was observed (~6 months after germination).  
171

### 172 Mitochondrial isolation

173 Within 7 days after the first flower was observed ( $5.6 \pm 1.6$  days standard deviation), mt  
174 respiration was quantified. Plants were therefore of similar developmental ages, although time between  
175 germination and experimentation varied by ~2 months among individuals. Amount of vegetative growth  
176 also varied among individuals. For plants with enough tissue, 1 g of rosette and cauline leaf were  
177 removed, whereas all rosette and cauline leaves were used for plants with less vegetative growth  
178 (minimum 0.1 g).

179 Leaves were finely diced and then ground with a mortar and pestle on ice in 5 mL of ice-cold mt  
180 isolation buffer (300 mM sucrose, 30 mM  $\text{KH}_2\text{PO}_4$ , 2mM EDTA, 0.8% polyvinylpyrrolidone, 0.05%  
181 cysteine, 5 mM glycine, 0.3% BSA, pH 7.5, with 15 mM  $\beta$ -mercaptoethanol added just prior to  
182 use)(Delage *et al.*, 2003). This homogenate was strained through four layers of cheese cloth and one layer  
183 of Miracloth, aliquoted into 1.5 mL microcentrifuge tubes, and centrifuged at 2790 g for 5 minutes at 4 °C  
184 to pellet large cellular debris and remove intact chloroplasts. The supernatant was then centrifuged at  
185 12200 g for 15 minutes to pellet mitochondria. The mt pellet from each tube was then resuspended gently  
186 using paintbrushes in 100  $\mu\text{L}$  of MiR05 buffer (110 mM sucrose, 20 mM HEPES, 10 mM  $\text{KH}_2\text{PO}_4$ , 20  
187 mM taurine, 20 mM lactobionic acid, 3 mM  $\text{MgCl}_2 \cdot 6\text{H}_2\text{O}$ , 0.6 mM EGTA, 1 g/L BSA)(Gnaiger *et al.*,  
188 2000) and combined into a single tube for each sample. This suspension was centrifuged again at 12200 g  
189 for 5 minutes, the supernatant was removed, and the final mt pellet was resuspended in 200  $\mu\text{L}$  of MiR05.

190 This resulted in only a crude mt isolate and the final suspension was green, indicating the presence of  
191 broken plastids/thylakoids. However, further purification via Percoll or sucrose gradients and  
192 ultracentrifugation (e.g., following Murcha and Whelan, 2015) did not produce respiring mitochondria.  
193 Furthermore, the chloroplast-enriched isolates obtained after the first 2790 g centrifugation showed  
194 minimal respiration compared. Therefore, we proceeded using the crude mt isolation protocol.

195  
196 Mitochondrial respiration protocol

197 Mt respiration was quantified using an Oxygraph 2k (O2K) high-resolution respirometer  
198 (Oroboros Instruments GmbH, Innsbruck, Austria) from freshly obtained mt isolates. Respiration rates  
199 were normalized to total protein content, which was measured using a Qubit Fluorometer (ThermoFisher).  
200 Two O2Ks were used during experiments, each with two sample chambers, so that four samples were run  
201 simultaneously. Therefore, in a given day four samples were run immediately after mt isolation, while  
202 four samples were kept on ice until they were run (~4 hours after mt isolation). Prior to adding the mt  
203 isolate, the oxygen content of MiR05 respiration buffer in the 2 mL chamber was air-calibrated to  
204 approximately 160  $\mu\text{M}$  while stirring at 750 rpm, calculated using a barometer and known oxygen  
205 solubility of MiR05 (0.92). Following each experiment, respiration chambers were rinsed in 100%  
206 ethanol six times, immersed in 100% ethanol for at least 45 minutes, washed six times with 70% ethanol,  
207 and washed six times with ddH<sub>2</sub>O before adding MiR05 for the next experiment. All data were collected  
208 at 25 °C with lights turned off in the respiration chambers to minimize effects of photorespiration.

209 A primary aim of this study was to develop a comprehensive protocol for assessing the individual  
210 and integrative aspects of OXPHOS function in plant mitochondria. To this end, we created a multi-  
211 substrate and inhibitor titration protocol for plant mt isolates that generates seven distinct respiratory  
212 states suitable for individual and relative analyses (Fig. 1B). A detailed description of the protocol and  
213 associated respiratory states is provided in Table 1. Briefly, a volume of mt isolate with the equivalent of  
214 0.25 mg of total protein was added to each respiration chamber, followed by a combination of substrates  
215 and cofactors (Table S1) that support mt NADH production and generate a low-flux “LEAK” respiration  
216 state facilitated by proton leak across the inner membrane in the absence of ADP (similar to “State 2”  
217 respiration in Jacoby *et al.*, 2015; Fig. 1B, Table 1, Step A). ADP was added next to initiate OXPHOS,  
218 resulting in an increase in respiration rate due to dissipation of the proton gradient through the ATP  
219 synthase that limited electron flow in the preceding state (analogous to “State 3” respiration in Jacoby *et al.*,  
220 2015; Fig. 1B, Table 1, Step B). NADH was then added to support electron delivery to DH<sub>ex</sub> (Fig. 1B,  
221 Table 1, Step C), followed by succinate (SUCC) to supply electrons via succinate dehydrogenase  
222 (Complex II, CII), generating the maximal OXPHOS-linked respiration rate observed in the experiment  
223 (Fig. 1B, Table 1, Step D). Rotenone (ROT) was then added to inhibit CI (Fig. 1B, Table 1, Step E), after  
224 which n-propyl gallate (nPG) was added to inhibit AOX (Fig. 1B, Table 1, Step F). Finally, ascorbate  
225 (ASC) then tetramethylphenylenediamine (TMPD) were added to fully reduce cytochrome c (CytC) and  
226 realize the maximal oxygen consumption (reductase) potential of CIV (Fig. 1B, Table 1, Step G), which  
227 typically exceeds that supported by upstream ETS and oxidation pathways (Gnaiger *et al.*, 1998;  
228 Rossignol *et al.*, 2003).

229 Oxygen concentration was recorded every two seconds and oxygen flux was calculated using the  
230 previous 10 seconds of data. Generally, oxygen flux stabilized during each respiration state for several  
231 minutes and flux data were extracted from this stable region. However, after addition of ADP (Fig. 1B), it  
232 was consistently observed that respiration rates peaked, decreased, and then slowly returned to peak levels  
233 after ~30 minutes (e.g., Fig. S1). Therefore, peak respiration immediately after adding ADP was used.  
234 Moreover, after adding ASC/TMPD, respiration peaked and then consistently declined (Fig. 1B), so peak  
235 respiration immediately after adding ASC/TMPD was used. Given the extended time needed to complete  
236 the protocol (~2 hours), during the course of some experiments (29%), oxygen was sufficiently depleted (<  
237 10 nmol O<sub>2</sub> mL<sup>-1</sup>) that chambers had to be reoxygenated by exposing them to air before continuing.  
238 Reoxygenation was never performed more than twice during any experiment, and preservation of mt  
239 quality was confirmed by stable retention of the respiration rate observed prior to reoxygenation.

240 Substrates and inhibitors were generally stored at -20 °C when not in use, with the exception of pyruvate  
241 that was made fresh before each experiment.

242

243 Respiratory flux control factors

244 A primary advantage of multi-substrate/inhibitor titration respirometry protocols is the ability to  
245 calculate internally-normalized flux control factors (FCFs) that express specific aspects of respiratory  
246 control by normalizing flux to a common reference state (Pesta and Gnaiger, 2012). Several factors were  
247 calculated to represent the extent of respiratory control exerted by specific sites of electron entry and  
248 removal from the ETS (Table 2). The respiratory control ratio (RCR) was also calculated as a common  
249 measure of mt quality (Jacoby *et al.*, 2015) by dividing the rate of respiration after adding ADP (Fig. 1B,  
250 Table 1, Step B) by the rate of respiration prior to adding ADP (Fig. 1B, Table 1, Step A).

251

252 Investigating inhibitory malate concentrations

253 Most of the substrate concentrations used above are commonly used in plant mt respiration  
254 protocols (e.g., Jacoby *et al.*, 2015). However, we investigated the effects of varying malate  
255 concentrations because the typical concentrations of 10-30 mM used in previous plant experiments (e.g.,  
256 Douce *et al.*, 1977; Siedow and Girvin, 1980; Day *et al.*, 1985; Jacoby *et al.*, 2015) have been shown to  
257 inhibit mt respiration in other systems (Sumbalova *et al.*, 2014a; Makrecka-Kuka *et al.*, 2015). Two  
258 preliminary experiments were performed to assess inhibitory effects of high malate concentrations.

259 In the first experiment, respiration was examined in isolated mitochondria from *S. noctiflora* (a  
260 close relative of *S. conica* that also has an unusual mt genome) and *Pisum sativum* (a model for plant mt  
261 respiration with a more “normal” mt genome). Germination, mt isolation, and mt respiration were  
262 performed essentially as described above, except that additional malate was titrated into the chamber to  
263 evaluate responses to cumulative concentrations of 0.5 mM (as used above), 1 mM, 1.5 mM, 2 mM, and 3  
264 mM. In the second experiment, a similar strategy was followed, with three differences: ADP was added  
265 before the addition of any malate, the AOX was inhibited at the start of the experiment by nPG, and  
266 malate concentrations ranged between 0.5 mM and 25 mM. In both experiments, additional substrates and  
267 inhibitors were added after the highest concentration of malate was achieved.

268

269 COX enzyme activity

270 To complement measurements of mt respiration, COX enzyme activity was quantified in the  
271 same mt isolates. The assay is based on the oxidation of reduced CytC by COX in the sample, with the  
272 formation of oxidized CytC resulting in a linear decrease in absorbance at 550 nm (Storrie and Madden,  
273 1990). Reactions were performed in 96 well plates using 200  $\mu$ L of sample buffer (120 mM Tris-KCl and  
274 250 mM Tris-sucrose). Isolates were stored at -20 °C and 1-10  $\mu$ L of thawed stock mt isolate was added  
275 to each reaction, resulting in adding 1-16  $\mu$ g per reaction. The reaction was started by adding 10  $\mu$ L of  
276 reduced CytC (0.22 mM) to each well (prepared by adding 5  $\mu$ L of 100 mM DTT per mL of oxidized  
277 CytC, mixing gently, and incubating at room temperature for at least one hour). The plate was then loaded  
278 into a Spectramax 2e spectrofluorometer plate reader (Molecular Devices, San Jose, CA), shaken for 10  
279 seconds, and absorbance at 550 nm was recorded every 30 seconds for 10 minutes. The absolute slope of  
280 a line fitted through these data was taken as COX enzyme activity, which was normalized to protein  
281 concentration and averaged among two technical replicates.

282

283 Metrics of plant fitness

284 Within seven days after flowering ( $1.7 \pm 2.3$  days standard deviation) but before tissue was  
285 harvested to prepare mt isolates, three metrics of plant fitness were quantified. Rosette diameter was  
286 measured to the nearest centimeter by measuring combined length of the largest rosette leaves. Plant  
287 height was measured similarly by using the tallest inflorescence. The number of stems per plant was also  
288 quantified. Finally, number of capsules and an approximation of total seed weight were quantified. These  
289 last two measures were performed after plants had senesced (about a year after flowering) and therefore:  
290 1) these measures were not able to be quantified for all individuals due to some individual plant loss, and

291 2) these metrics were measured well after tissue had been removed for preparing mt isolates. It is likely  
292 that removing tissue therefore affected seed production, especially for plants with low amounts of  
293 vegetative growth. However, plants with little vegetative growth usually only had 1 or 2 stems and few  
294 buds at time of first flowering, suggesting these individuals would have produced few seeds regardless.  
295

#### 296 Imaging mitochondria *in vivo*

297 Mitochondria were visualized using real-time imaging in living tissue of three species: *S.*  
298 *noctiflora*, which has unusual mt genomic features similar to *S. conica*, and *S. latifolia* and *S. vulgaris*,  
299 both of which show mt genomes more typical of angiosperms. Intact 7 to 10 day-old seedlings were  
300 incubated in the red fluorescent potentiometric dye tetramethylrhodamine methyl ester (TMRM) that  
301 accumulates reversibly in mitochondria in response to the inner membrane potential (Brand and Nicholls,  
302 2011). Following incubation in freshly prepared 50 nM TMRM for 15 minutes, seedlings were mounted  
303 in TMRM between slide and cover slip within a chamber created using thin double-sided adhesive tape  
304 (Ekanayake *et al.*, 2015). Microscopy was performed using a Zeiss Axioimager Z2 equipped with a Plan-  
305 Achromat 100x/1.40 oil immersion objective and 63HE filter set (Ex: 572/25 nm, Em: 629/62 nm).  
306 Excitation was provided by a Zeiss HXP-120 metal halide lamp. Images were captured using a  
307 Hamamatsu Orca Flash 4 CMOS camera connected to Zeiss Zen software. Independent observations of at  
308 least three seedlings were made on at least two different dates.  
309

#### 310 Statistical analyses

311 All statistical analyses were performed using R v3.4.3 (R Development Core Team, 2012) using  
312 general linear models and the *lm* function for continuous data and generalized linear models and the *glm*  
313 function/Poisson regressions for count data. Tukey post-hoc analyses were used to test for significant  
314 differences among populations.  
315

## 316 Results

317

#### 318 Germination rate and plant fitness

319 Three weeks after planting, all eight seeds had germinated for *S. conica* KEWI and KEWJ, while  
320 7/8 had germinated for SEN, 15/24 for ABR, and 10/16 for the single *S. subconica* accession (Fig. 2A).  
321 These counts remained unchanged by four weeks after planting, and dormant seeds were excluded from  
322 the rest of the study. All seeds that germinated eventually went on to flower except for a single *S.*  
323 *subconica* individual that had not produced a reproductive stem by seven months after germination and  
324 was used for mt respiration and COX activity experiments but not scored for plant fitness metrics.  
325

326 There were few significant intra- or interspecific differences in common metrics of plant fitness.  
327 Although often correlated (Table S2), the differences in fitness metrics among accessions were not always  
328 congruent (Fig. 2B-F). For example, *S. conica* SEN had a total seed mass that was nearly four times larger  
329 than other accessions on average ( $P \leq 0.044$ ) but was also shorter and tended to have fewer stems (Fig. 2).  
330 Because many seeds were likely dropped naturally before seed mass was quantified, the number of  
331 capsules produced may be a more accurate metric of fitness, although the two metrics are highly  
332 correlated (Fig. S2). *S. conica* SEN as well as the single accession of *S. subconica* produced more than  
333 twice as many capsules as the other accessions (Fig. 2E,  $P < 0.001$ ), but variation in these accessions was  
334 also much larger than in others, and significant differences may be driven by outliers with large numbers  
335 of capsules (e.g., in *S. subconica* zero to 128 capsules were produced).  
336

#### 336 Developing a protocol to quantify mt respiration

337 During preliminary experiments to develop our protocol, we found that malate concentrations of  
338 2 mM or higher in *S. noctiflora* and 1.5 mM or higher in *P. sativum* began to inhibit respiration (Fig. S3A,  
339 B). Adding succinate partially restored respiration in *P. sativum* but had little effect in *S. noctiflora* (Fig.  
340 S3A, B). In another experiment, malate concentrations above 3 mM decreased respiration, ultimately  
341 causing respiration to drop below baseline levels at 15 mM (Fig. S3C, D). While adding NADH to supply

342 electrons via  $DH_{ex}$  partially rescued respiration under these conditions (Fig. S3C, D), adding succinate did  
343 not increase respiration in either species, consistent with an inhibitory effect of oxaloacetate production  
344 (from malate dehydrogenase) on CII (Makrecka-Kuka *et al.*, 2015; Sumbalova *et al.*, 2014b). Higher  
345 malate concentrations resulted in decreased respiration both when AOX was functional (Fig. S3A, B) and  
346 inhibited (Fig. S3C, D). Based on these results, we used 0.5 mM malate in our final protocol (Fig. 1B),  
347 and recommend that future studies carefully evaluate malate concentrations to optimize conditions for mt  
348 respirometry.

349 We ultimately developed a protocol that quantifies seven distinct mt respiratory states dependent  
350 on various components of the plant mt ETS (Fig. 1, Table 1). When this protocol was applied to isolated  
351 mitochondria from *Silene* species with unusual mt genomes, expected responses to respiratory substrates  
352 and inhibitors were observed (Fig. 3A). Although other species were not examined thoroughly,  
353 preliminary experiments using two closely related species with “normal” mt genomes (*S. latifolia* and *P.*  
354 *sativum*) yielded qualitatively similar results (Fig. S3).

355  
356 Inter- and intraspecific variation in *Silene* mt respiration and COX activity

357 The RCR serves as a general metric for mt quality, with RCR values  $> 2.5$  indicating high quality  
358 mt isolates (Jacoby *et al.*, 2015). Our crude mt isolations from *Silene* had RCRs ranging from 1.1 to 3.9,  
359 with some of this variation explained by inter- and intraspecific differences (Fig. S4). For example,  
360 isolates from *S. subconica* and *S. conica* KEWJ had significantly lower RCRs than two of the *S. conica*  
361 accessions (Fig. S4). When samples that had RCRs less than 1.5 were excluded, the qualitative difference  
362 remained with *S. subconica*, but disappeared for KEWJ, mainly because all *S. subconica* samples had low  
363 RCRs (max = 1.9), while some KEWJ samples had higher RCRs (max = 2.5).

364 Intra- and interspecific differences in mt respiration were not significant during any of the seven  
365 respiratory states when respiration was normalized to protein input (Fig. 3B) or COX activity (Fig. 3C). It  
366 should be noted that, similar to RCR results, *S. subconica* and KEWJ had lower protein-normalized  
367 respiration rates in all respiratory states, although these differences were not statistically significant (Fig.  
368 3B, min  $P = 0.13$ ). Interestingly, KEWI had one of the highest protein-normalized respiration rates (Fig.  
369 3B) but had the lowest COX-normalized rate in all states, but these differences were also not statistically  
370 significant (Fig. 3C, min  $P = 0.18$ ).

371 Calculation of internally-controlled respiratory flux control factors (FCFs) (Table 2) revealed  
372 intra- and interspecific differences that were otherwise concealed by variability in mt quantity or quality  
373 among samples within a group. FCFs normalize flux to preceding reference states within each sample  
374 experiment, which enables evaluation of how specific ETS components contribute to respiratory control.  
375 The first FCF investigated was OXPHOS coupling efficiency, which is mathematically similar to the  
376 RCR and estimates the extent of ADP control over respiration. As with the RCR, KEWJ and *S. subconica*  
377 had OXPHOS coupling efficiencies that were lower than the other populations (Fig. 4A,  $P < 0.041$ ). The  
378 proportion of NADH-supported OXPHOS contributed by external NADHs ( $DH_{ex}$ ) was higher in *S.*  
379 *subconica* compared to all *S. conica* accessions except KEWJ (Fig. 4B,  $P < 0.030$ ). The CI FCF estimates  
380 the proportion of maximal OXPHOS contributed by CI and did not vary statistically among the groups  
381 (Fig. 4C,  $P > 0.652$ ). However, the analogous CII FCF was higher in *S. subconica* than in *S. conica* ABR  
382 and KEWI (Fig. 4D,  $P < 0.020$ ). The AOX FCF was not statistically variable among the accessions (Fig.  
383 4E,  $P > 0.768$ ), nor was excess CIV capacity (Fig. 4F,  $P > 0.193$ ).

384 COX enzymatic activity when normalized to protein input was higher in *S. conica* KEWI and  
385 SEN compared to *S. conica* ABR and KEWJ (Fig. S5;  $0.01 < P < 0.05$ ). COX enzymatic activity was  
386 positively related to excess CIV capacity, although not statistically significant ( $P = 0.063$ ,  $r = 0.26$ ). COX  
387 activity was significantly and positively correlated with maximal OXPHOS flux (step D in Table 1 and  
388 Fig. 1:  $P = 0.048$ ,  $r = 0.28$ ), consistent with its central role in mt respiration.

389  
390 Correlations between FCFs and fitness metrics

391 Several FCFs were significantly correlated with each other (Fig. 5 and Table S2), with a few key  
392 themes emerging. First, OXPHOS coupling efficiency was negatively correlated with both  $DH_{ex}$  and CII



393 flux, which were positively correlated with one another (Fig. 5,  $P < 0.016$ ). Secondly, CI flux was  
394 positively correlated with CII and AOX flux (although not statistically significant: Fig. 5,  $P = 0.052$  and  
395 0.080, respectively), which were also positively correlated with one another ( $P = 0.002$ ). Finally, in some  
396 cases these correlations are likely driven by differences between species. For example, *S. subconica*  
397 showed large CII and  $DH_{ex}$  fluxes, but low CI flux and OXPHOS coupling efficiency, while ABR showed  
398 the opposite pattern (Figs. 4 and 5).

399 We also determined whether the plant fitness metrics quantified here were predictive of any FCFs  
400 or the maximal, protein-normalized respiration rate. Only a single correlation between an FCF and a plant  
401 fitness metric was statistically significant (Table S2) but was not so after correcting for multiple  
402 comparisons. There was a consistent positive correlation between all fitness metrics and maximal,  
403 protein-normalized respiration (Fig. S6;  $0.03 > P > 0.90$ ).

404  
405 Morphology and dynamics of *Silene* mitochondria

406 *Silene* seedling mitochondria are readily stained with TMRM allowing a rapid means to  
407 investigate their morphology and dynamics in living tissue (Fig. 6). The mitochondria of all three species  
408 investigated (*S. vulgaris*, *noctiflora*, and *latifolia*) show similar morphology (size and shape): physically  
409 discrete, spherical to short vermiform structures, typically 0.5 to 1  $\mu\text{m}$  in diameter/length (Fig. 6, Fig. S7).  
410 As such, the mitochondria of these three species are morphologically similar to mitochondria in model  
411 species such as Arabidopsis and tobacco that have been visualised with TMRM, Green Fluorescent  
412 Protein, or the lipophilic fluorophore DiOC6 (Logan and Leaver, 2000; Van Gestel and Verbelen, 2002;  
413 Schwarzlander *et al.*, 2012). Although a thorough quantification is beyond the scope of this work, other  
414 characteristics, such as number of mitochondria per cell, and their dynamic movement (Supplemental  
415 Videos S1 and S2) do not appear distinct from those of the model plant Arabidopsis.

416  
417 **Discussion**

418  
419 Do unusual mt genomes cause unusual mt function? Sometimes...

420  
421 The discovery of multiple, independent angiosperm lineages that show elevated rates of sequence  
422 evolution and odd structures in their mt genomes (Mower *et al.*, 2007) raises the question of whether mt  
423 function in these lineages has been altered. Here, we lay the groundwork for answering this question by  
424 examining two species in the genus *Silene* that display unusual mitogenomic features. Specifically, mt  
425 rates of evolution are highly elevated in these species (Sloan *et al.*, 2009) – for example, there are 32  
426 amino acid substitutions in Cox1 between Arabidopsis and *S. conica*, while there are only 7 substitutions  
427 between *A. thaliana* and *S. latifolia* (a close relative of *S. conica* with typical mt genomic features of  
428 angiosperms). These species also have incredibly expanded mt genomes (i.e., 11 Mbp vs. 0.3 Mbp) that  
429 have become fragmented into dozens of chromosomes (vs. a single chromosome)(Sloan *et al.*, 2012a).  
430 Therefore, it is reasonable to imagine that either due to increased divergence at the molecular level or  
431 genomic rearrangements, mt function may be altered in these species. Here, we show that mt respiration  
432 in these species generally follows the expected patterns observed in other angiosperms with more typical  
433 mt genomes, and we develop a protocol to address the question in detail.

434 When substrates linked to CI,  $DH_{ex}$ , and CII were added to isolated mitochondria, respiration  
435 increased as it has been shown to do in other angiosperms with typical mt genomes (Fig. 4; e.g. Douce *et al.*, 1977). In addition, as in other angiosperms, inhibitors for CI and the AOX caused reduced respiration  
436 (Fig. 4; Ikuma and Bonner, 1967; Siedow and Girvin, 1980), while ASC/TMPD resulted in a large  
437 increase in respiration reflecting a significant excess capacity of cytochrome oxidase (Day *et al.*, 1978).  
438 These results suggest CI, CII, CIV,  $DH_{ex}$ , and AOX are functional in *S. conica* and *S. subconica* and  
439 likely play similar roles as in other angiosperms.

440 Importantly, our study did not include paired mt samples from closely related species such as *S.*  
441 *latifolia* and *S. vulgaris* that possess more “normal” plant mt genomes, which is an obvious next step for  
442 future studies. However, a first approach at visualizing mitochondria in *Silene* species with unusual  
443

444 patterns of mt genome evolution did suggest that abnormal mt genomic evolution does not lead to  
445 obviously abnormal mitochondria (Fig. 6). Further visualization experiments that pair SYBR Green and  
446 TMRM staining would be useful to determine whether mtDNA is distributed differently in the  
447 mitochondria of different *Silene* species. The range of RCRs observed here (1.1 –3.9) is also similar (1.3  
448 – 3.7) to that reported for leaves from adults in peas (Flowers, 1974; Day *et al.*, 1985). The response to  
449 substrates such as NADH and succinate were also comparable to those observed in other systems  
450 (Karapanos *et al.*, 2009). Moreover, preliminary experiments performed while developing the mt  
451 respiration protocol using *S. latifolia* and *P. sativum* resulted in qualitatively similar results.

452 Calculating FCFs as performed here is also an attractive methodology for directly comparing  
453 species with unusual vs. typical mt genomes. FCFs allow specific respiratory components to be quantified  
454 by normalization to a common reference respiratory state. However, they have not been widely adopted in  
455 plant mt respiration experiments. By comparing FCFs instead of respiration rates, the amount (and to a  
456 lesser extent, quality) of mitochondria loaded in a particular sample is controlled for, making this  
457 approach ideal for comparing crude mt isolates from even distantly related species. Specifically, when  
458 comparing species with normal vs. atypical mt genomes, we might predict that FCFs that capture  
459 OXPHOS-linked respiration contributed by chimeric mitonuclear OXPHOS complexes (e.g., CI and CIV)  
460 would vary, while FCFs that describe flux mediated by complexes composed solely of nuclear-encoded  
461 subunits (e.g., DH<sub>ex</sub>, CII, and AOX) would serve as controls. Therefore, while it is not possible at this  
462 time to provide a detailed quantification of mt respiration in *Silene* species with unusual vs. typical mt  
463 genomes, our current data do not indicate any major alterations in mt form or function in *Silene* species  
464 with unusual patterns of mt evolution.

465 Why do some lineages with fast-evolving mt genomes such as *Viscum* have altered mt function,  
466 while *Silene* appears to have largely typical patterns of mt respiration? Accelerated evolutionary rates in  
467 *Viscum* are associated with the loss of many mt genes and a large reduction in genome size (Skippington  
468 *et al.*, 2015, 2017). Importantly, CI mt genes have been entirely lost in *Viscum* (i.e., not transferred to the  
469 nuclear genome), which explains why CI activity has been lost and activities of the AOX and alternative  
470 NADH dehydrogenases are elevated (Maclean *et al.*, 2018). In addition, the formation of OXPHOS  
471 “supercomplexes” and mt morphology are altered in *Viscum*, also likely due to loss of CI (Senkler *et al.*,  
472 2018). On the other hand, accelerated mt evolution in *Silene* has resulted in expanded genomes and  
473 retention of protein coding genes. Moreover, signals of purifying selection (i.e.,  $d_N/d_S \ll 1$ ) from mt-  
474 encoded OXPHOS genes in *Silene* with accelerated mt rates were as strong as those in species with slow  
475 rates of mt evolution (Havird *et al.*, 2015). Therefore, while both *Viscum* and *Silene* have experienced  
476 patterns of accelerated evolution in their mt genomes, the types of evolution (relaxed vs. purifying) and  
477 implications for mt function are not the same. We speculate that this may be due to the parasitic vs. free-  
478 living lifestyles of *Viscum* vs. *Silene*. Although not all parasitic plants have reduced mt gene content (Fan  
479 *et al.*, 2016), they do tend to show elevated rates of mt genomic evolution compared to free-living  
480 relatives (Bromham *et al.*, 2013), possibly reflecting increased mutation rates or relaxed selection.

#### 481 482 Inter- and intraspecific variation in *Silene* mt function

483  
484 There was significant inter- and intraspecific variation in the mt properties examined here. Most  
485 notably, *S. subconica* and *S. conica* KEWJ had lower OXPHOS coupling efficiency (Fig. 4A), lower  
486 overall respiration rates (Fig. 3B), greater CII control over respiration (Fig. 4D), and lower COX activity  
487 (Fig. S5) than other accessions of *S. conica*. One explanation for these results is that specific populations  
488 or species of *Silene* may have undergone environmental adaptation in mt function. For example, in  
489 *Plantago*, another angiosperm genus that shows variation in rates of mt genome evolution, closely related  
490 highland and lowland species had variable rates of leaf respiration (Atkin *et al.*, 2006). Respiration also  
491 varies in general across climates and geography for a wide range of species (Atkin *et al.*, 2015). Both *S.*  
492 *conica* and *S. subconica* have large distributions with somewhat isolated populations found in disparate  
493 environments – from mountain tops to sandy beaches (Jalas and Suominen, 1988). Therefore, it is  
494 possible that specific populations have adapted to utilize slightly different mt respiratory pathways. Given

495 the high rate of molecular evolution in the mt genomes of these species, the phenotypic variation  
496 observed here might even be partly attributable to variation in mtDNA.

497 Another reason for the inter- and intraspecific variation observed here may be that, despite our  
498 best efforts to control environmental factors in the greenhouse, some accessions may have experienced  
499 slightly different environments. It has long been known that mt function is plastic in plants. For example,  
500 pea seedlings grown under water stress had lower RCRs than controls (Generozova *et al.*, 2009) and AOX  
501 flux control also varies with environment (Fiorani *et al.*, 2005; Vanlerberghe, 2013; Ahanger *et al.*, 2017).  
502 Given our relatively low sample sizes and the large amount of within-accession (i.e., within genotype)  
503 variation seen in basic plant fitness metrics (Fig. 2), it is possible that differences in watering and  
504 microenvironmental conditions may explain some of the variation observed here. Future experiments  
505 performed in climate-controlled growth chambers may alleviate this source of variation.

506  
507 A novel protocol for assessing mt respiration

508  
509 One of our primary goals was to develop a novel respirometry protocol that investigates the  
510 relative contributions of specific ETS components to plant mt respiration. The protocol developed here  
511 (Fig. 1A) does not use any novel substrates or inhibitors, but the order in which they are added to the  
512 reaction allows for a detailed accounting of FCFs capable of elucidating inter- and intraspecific variation  
513 in mt function not revealed by conventional assays. Cross-species analyses in the present study found that  
514 mitochondria with low OXPHOS coupling efficiency tended to have higher CII, DH<sub>ex</sub>, and AOX fluxes,  
515 suggesting a greater reliance on these latter components over CI (Fig. 5). These inverse relationships  
516 make sense, because CII, DH<sub>ex</sub>, and AOX do not couple electron transfer with proton translocation that  
517 powers the ATP synthase, whereas CI does. This type of “inefficient” respiratory profile has been  
518 observed previously in *Nicotiana sylvestris* showing cytoplasmic male sterility due to mitonuclear  
519 incompatibility (see below; Sabar *et al.*, 2000). Samples from *S. subconica* and to a lesser extent the *S.*  
520 *conica* KEWJ exhibited this profile, while the other samples showed greater respiratory control by CI.  
521 Overall respiration, which was lower in *S. subconica*, was also correlated with fitness (Fig. S6),  
522 suggesting that different respiratory profiles in *Silene* may be under selection if they have a genetic basis.

523 A promising application of our protocol concerns the concept of mitonuclear incompatibility  
524 (Hill, 2017; Sloan *et al.*, 2017). Our results confirm that complexes composed entirely of nuclear-encoded  
525 subunits as well as chimeric complexes with mt-encoded subunits as their core (Fig. 1A) both contribute  
526 to mt respiration in these *Silene* species. Under a mitonuclear (in)compatibility framework, mt and  
527 nuclear genomes within a population or species are thought to be “matched” to one another due to a long  
528 history of coevolution. However, when species or populations interbreed, resulting offspring can end up  
529 with “mismatched” genomes from different lineages, resulting in reduced fitness in hybrids and ultimately  
530 reproductive isolation between populations (Burton and Barreto, 2012; Hill, 2016; Sloan *et al.*, 2017).  
531 Chimeric mitonuclear OXPHOS complexes containing mt-encoded subunits are hypothesized to be  
532 affected by compromised mitonuclear interactions, while complexes composed entirely of nuclear-  
533 encoded subunits should not be affected. Our protocol and the FCFs calculated here allow mt respiration  
534 to be parsed into contributions from chimeric and purely nuclear complexes and should therefore allow  
535 this hypothesis to be tested in a novel way using systems showing compromised mitonuclear interactions  
536 (e.g., Burton *et al.*, 2006).

537 Angiosperms and *Silene* in particular offer unique opportunities to study the functional  
538 implications of mitonuclear incompatibilities. In animal-based studies, CII is the only OXPHOS complex  
539 composed solely of nuclear-encoded subunits and has therefore become the “go-to” control for  
540 mitonuclear incompatibilities in studies of mitonuclear coevolution and mt function (Ellison and Burton,  
541 2006). Plants offer an additional set of nuclear-encoded controls in the AOX and alternative NADH  
542 dehydrogenases. Additionally, CII is entirely nuclear-encoded in some angiosperms but has retained some  
543 mt-encoded subunits in other lineages (Adams *et al.*, 2002). Therefore, mitonuclear incompatibilities  
544 induced by hybridization should produce different but predictable effects on mt function between plants  
545 and animals and among different angiosperm lineages. Results presented here and elsewhere (Sabar *et al.*,

546 2000) suggest that the proportion of respiration contributed by the AOX, alternative NADHs, and CII  
547 may be elevated in systems with compromised mitonuclear interactions, perhaps reflecting a mismatch  
548 between substrate oxidation and ADP phosphorylation capacity. *Silene* in particular offers an interesting  
549 system to begin to examine these effects, as clear evidence for mitonuclear coevolution has been found  
550 using different *Silene* lineages with variable rates of mt evolution (Sloan *et al.*, 2014; Havird *et al.*, 2015;  
551 Havird *et al.*, 2017). A clear future goal for studies of mitonuclear interactions would therefore be to  
552 examine hybrids predicted to show mitonuclear incompatibilities with a protocol like the one developed  
553 here.

### 554 **Acknowledgements**

555 We wish to thank Lance Li Puma for assistance with the O2K, members of the Graham Peers lab  
556 for assistance with COX activity assays, and members of the Sloan lab for comments on this work. This  
557 work was supported by NIH F32GM116361 to JCH and NSF MCB 1412260 to DBS.

### 558 **Supplementary data**

559 Table S1. Details on substrates, cofactors, and inhibitors used in the mt respiration protocol.

560 Table S2. Correlations among metrics of plant fitness and flux control factors (Table 2). *P* values are  
561 presented above the diagonal (based on linear models), while  $r^2$  values are presented below the diagonal.  
562 Significant correlations at  $P < 0.05$  are bolded.

563 Fig. S1. Mitochondrial respiration in *Silene conica* (SEN) during the protocol detailed in Fig. 1, showing  
564 that peak values following the addition of ADP (D) are generally recovered if given enough time.

565 Fig. S2. Correlation between total seed mass and the number of capsules.

566 Fig. S3. Mitochondrial respiration under increasing malate concentration (M) in *S. noctiflora* and *P.*  
567 *sativum*.

568 Fig. S4. Respiratory control ratios (RCR) in *Silene*.

569 Fig. S5. Cytochrome c oxidase (COX) activity in *Silene* normalized to protein input.

570 Fig. S6. Correlations between plant fitness metrics and maximal, protein normalized respiration rate.

571 Fig. S7. Epifluorescence micrographs of mitochondria in an epidermal cell of an intact root of *Silene*  
572 *latifolia* stained with TMRM.

573 Supplemental Video S1. Movie of mitochondria in an epidermal cell in an intact root of *Silene noctiflora*  
574 stained with TMRM.

575 Supplemental Video S2. Movie of mitochondria in an epidermal cell in an intact root of *Silene vulgaris*  
576 stained with TMRM.

### 577 **References**

578 **Adams KL, Qiu YL, Stoutemyer M, Palmer JD.** 2002. Punctuated evolution of mitochondrial  
579 gene content: high and variable rates of mitochondrial gene loss and transfer to the nucleus  
580 during angiosperm evolution. *Proc Natl Acad Sci USA* **99**, 9905-9912.

- 596 **Affourtit C, Krab K, Moore AL.** 2001. Control of plant mitochondrial respiration. *Biochimica*  
597 *Et Biophysica Acta-Bioenergetics* **1504**, 58-69.
- 598 **Ahanger MA, Akram NA, Ashraf M, Alyemeni MN, Wijaya L, Ahmad P.** 2017. Plant  
599 responses to environmental stresses-from gene to biotechnology. *Aob Plants* **9**, 17.
- 600 **Alverson AJ, Rice DW, Dickinson S, Barry K, Palmer JD.** 2011. Origins and Recombination  
601 of the Bacterial-Sized Multichromosomal Mitochondrial Genome of Cucumber. *Plant Cell* **23**,  
602 2499-2513.
- 603 **Atkin OK, Bloomfield KJ, Reich PB, Tjoelker MG, Asner GP, Bonal D, Bonisch G,**  
604 **Bradford MG, Cernusak LA, Cosio EG, Creek D, Crous KY, Domingues TF, Dukes JS,**  
605 **Egerton JJG, Evans JR, Farquhar GD, Fyllas NM, Gauthier PPG, Gloor E, Gimeno TE,**  
606 **Griffin KL, Guerrieri R, Heskell MA, Huntingford C, Ishida FY, Kattge J, Lambers H,**  
607 **Liddell MJ, Lloyd J, Lusk CH, Martin RE, Maksimov AP, Maximov TC, Malhi Y, Medlyn**  
608 **BE, Meir P, Mercado LM, Mirotchnick N, Ng D, Niinemets U, O'Sullivan OS, Phillips OL,**  
609 **Poorter L, Poot P, Prentice IC, Salinas N, Rowland LM, Ryan MG, Sitch S, Slot M, Smith**  
610 **NG, Turnbull MH, VanderWel MC, Valladares F, Veneklaas EJ, Weerasinghe LK, Wirth**  
611 **C, Wright IJ, Wythers KR, Xiang J, Xiang S, Zaragoza-Castells J.** 2015. Global variability  
612 in leaf respiration in relation to climate, plant functional types and leaf traits. *New Phytologist*  
613 **206**, 614-636.
- 614 **Atkin OK, Scheurwater I, Pons TL.** 2006. High thermal acclimation potential of both  
615 photosynthesis and respiration in two lowland *Plantago* species in contrast to an alpine  
616 congeneric. *Global Change Biology* **12**, 500-515.
- 617 **Balaban RS.** 1990. REGULATION OF OXIDATIVE-PHOSPHORYLATION IN THE  
618 MAMMALIAN-CELL. *American Journal of Physiology* **258**, C377-C389.
- 619 **Berry S.** 2003. Endosymbiosis and the design of eukaryotic electron transport. *Biochimica Et*  
620 *Biophysica Acta-Bioenergetics* **1606**, 57-72.
- 621 **Brand MD, Nicholls DG.** 2011. Assessing mitochondrial dysfunction in cells. *Biochemical*  
622 *Journal* **435**, 297-312.
- 623 **Bromham L, Cowman PF, Lanfear R.** 2013. Parasitic plants have increased rates of molecular  
624 evolution across all three genomes. *Bmc Evolutionary Biology* **13**, 11.
- 625 **Brown WM, George M, Wilson AC.** 1979. Rapid evolution of animal mitochondrial-DNA.  
626 *Proc Natl Acad Sci USA* **76**, 1967-1971.
- 627 **Burton RS, Barreto FS.** 2012. A disproportionate role for mtDNA in Dobzhansky-Muller  
628 incompatibilities? *Mol Ecol* **21**, 4942-4957.
- 629 **Burton RS, Ellison CK, Harrison JS.** 2006. The sorry state of F2 hybrids: consequences of  
630 rapid mitochondrial DNA evolution in allopatric populations. *Am Nat* **168 Suppl 6**, S14-24.
- 631 **Cho Y, Mower JP, Qiu YL, Palmer JD.** 2004. Mitochondrial substitution rates are  
632 extraordinarily elevated and variable in a genus of flowering plants. *Proc Natl Acad Sci U S A*  
633 **101**, 17741-17746.
- 634 **Chung DJ, Sparagna GC, Chicco AJ, Schulte PM.** 2018. Patterns of mitochondrial membrane  
635 remodeling parallel functional adaptations to thermal stress. *Journal of Experimental Biology*  
636 **221**.
- 637 **Considine MJ, Holtzapffel RC, Day DA, Whelan J, Millar AH.** 2002. Molecular distinction  
638 between alternative oxidase from monocots and dicots. *Plant Physiology* **129**, 949-953.
- 639 **Day DA, Arron GP, Christoffersen RE, Laties GG.** 1978. EFFECT OF ETHYLENE AND  
640 CARBON-DIOXIDE ON POTATO METABOLISM - STIMULATION OF TUBER AND

- 641 MITOCHONDRIAL RESPIRATION, AND INDUCEMENT OF ALTERNATIVE PATH. *Plant*  
642 *Physiology* **62**, 820-825.
- 643 **Day DA, Neuburger M, Douce R.** 1985. BIOCHEMICAL-CHARACTERIZATION OF  
644 CHLOROPHYLL-FREE MITOCHONDRIA FROM PEA LEAVES. *Australian Journal of Plant*  
645 *Physiology* **12**, 219-228.
- 646 **Delage L, Duchene AM, Zaepfel M, Marechal-Drouard L.** 2003. The anticodon and the D-  
647 domain sequences are essential determinants for plant cytosolic tRNA(Val) import into  
648 mitochondria. *Plant Journal* **34**, 623-633.
- 649 **Douce R, Moore AL, Neuburger M.** 1977. ISOLATION AND OXIDATIVE PROPERTIES  
650 OF INTACT MITOCHONDRIA ISOLATED FROM SPINACH LEAVES. *Plant Physiology* **60**,  
651 625-628.
- 652 **Ekanayake SB, El Zawily AM, Paszkiewicz G, Rolland A, Logan DC.** 2015. Imaging and  
653 Analysis of Mitochondria! Dynamics in Living Cells. *Plant Mitochondria: Methods and*  
654 *Protocols* **1305**, 223-240.
- 655 **Ellison CK, Burton RS.** 2006. Disruption of mitochondrial function in interpopulation hybrids  
656 of *Tigriopus californicus*. *Evolution* **60**, 1382-1391.
- 657 **Fan WS, Zhu AD, Kozaczek M, Shah N, Pabon-Mora N, Gonzalez F, Mower JP.** 2016.  
658 Limited mitogenomic degradation in response to a parasitic lifestyle in Orobanchaceae.  
659 *Scientific Reports* **6**, 9.
- 660 **Finnegan P, Soole K, Umbach A.** 2004. Alternative mitochondrial electron transport proteins in  
661 higher plants. In: Day D, Millar A, Whelan J, eds. *Plant Mitochondria: From Gene to Function*,  
662 Vol. 17. The Netherlands Kluwer, Dordrecht, 163-230.
- 663 **Fiorani F, Umbach AL, Siedow JN.** 2005. The alternative oxidase of plant mitochondria is  
664 involved in the acclimation of shoot growth at low temperature. A study of *Arabidopsis* AOX1a  
665 transgenic plants. *Plant Physiology* **139**, 1795-1805.
- 666 **Flowers TJ.** 1974. SALT TOLERANCE IN *SUAEDA-MARITIMA* (L) DUM -  
667 COMPARISON OF MITOCHONDRIA ISOLATED FROM GREEN TISSUES OF *SUAEDA*  
668 AND *PISUM*. *Journal of Experimental Botany* **25**, 101-110.
- 669 **Generozova IP, Maevskaya SN, Shugaev AG.** 2009. The inhibition of mitochondrial metabolic  
670 activity in etiolated pea seedlings under water stress. *Russian Journal of Plant Physiology* **56**, 38-  
671 44.
- 672 **Gnaiger E.** 2005. High-resolution respirometry for the study of mitochondrial function in health  
673 and disease. The OROBOROS Oxygraph-2k. *Shock* **23**, 6-6.
- 674 **Gnaiger E, Kuznetsov AV, Schneeberger S, Seiler R, Brandacher G, Steurer W,**  
675 **Margreiter R.** 2000. Mitochondria in the cold. *Life in the Cold*, 431-442.
- 676 **Gnaiger E, Lassnig B, Kuznetsov A, Rieger G, Margreiter R.** 1998. Mitochondrial oxygen  
677 affinity, respiratory flux control and excess capacity of cytochrome c oxidase. *Journal of*  
678 *Experimental Biology* **201**, 1129-1139.
- 679 **Gualberto JM, Newton KJ.** 2017. Plant Mitochondrial Genomes: Dynamics and Mechanisms  
680 of Mutation. In: Merchant SS, ed. *Annual Review of Plant Biology, Vol 68*, Vol. 68. Palo Alto:  
681 Annual Reviews, 225-252.
- 682 **Haider F, Sokolov EP, Sokolova IM.** 2018. Effects of mechanical disturbance and salinity  
683 stress on bioenergetics and burrowing behavior of the soft-shell clam *Mya arenaria*. *Journal of*  
684 *Experimental Biology* **221**, 12.
- 685 **Havird JC, Trapp P, Miller CM, Bazos I, Sloan DB.** 2017. Causes and Consequences of  
686 Rapidly Evolving mtDNA in a Plant Lineage. *Genome Biology and Evolution* **9**, 323-336.

- 687 **Havird JC, Whitehill NS, Snow CD, Sloan DB.** 2015. Conservative and compensatory  
688 evolution in oxidative phosphorylation complexes of angiosperms with highly divergent rates of  
689 mitochondrial genome evolution. *Evolution* **69**, 3069-3081.
- 690 **Hill GE.** 2016. Mitonuclear coevolution as the genesis of speciation and the mitochondrial DNA  
691 barcode gap. *Ecology and Evolution* **6**, 5831-5842.
- 692 **Hill GE.** 2017. The mitonuclear compatibility species concept. *Auk* **134**, 393-409.
- 693 **Ikuma H, Bonner WD.** 1967. PROPERTIES OF HIGHER PLANT MITOCHONDRIA .3.  
694 EFFECTS OF RESPIRATORY INHIBITORS. *Plant Physiology* **42**, 1535-&.
- 695 **Jacoby RP, Li L, Huang SB, Lee C, Millar AH, Taylor NL.** 2012. Mitochondrial  
696 Composition, Function and Stress Response in Plants. *Journal of Integrative Plant Biology* **54**,  
697 887-906.
- 698 **Jacoby RP, Millar AH, Taylor NL.** 2015. Assessment of Respiration in Isolated Plant  
699 Mitochondria Using Clark-Type Electrodes. In: Whelan J, Murcha MW, eds. *Plant*  
700 *Mitochondria: Methods and Protocols*, Vol. 1305. Totowa: Humana Press Inc, 165-185.
- 701 **Jalas J, Suominen J.** 1988. *Atlas florae Europaeae : distribution of vascular plants in Europe.*  
702 Cambridge [England] ; New York: Cambridge University Press.
- 703 **Karapanos IC, Akoumianakis KA, Olympios CM, Passam HC.** 2009. The effect of substrate,  
704 ADP and uncoupler on the respiration of tomato pollen during incubation in vitro at moderately  
705 high temperature. *Sexual Plant Reproduction* **22**, 133-140.
- 706 **Logan DC, Leaver CJ.** 2000. Mitochondria-targeted GFP highlights the heterogeneity of  
707 mitochondrial shape, size and movement within living plant cells. *Journal of Experimental*  
708 *Botany* **51**, 865-871.
- 709 **Maclea AE, Hertle AP, Ligas J, Bock R, Balk J, Meyer EH.** 2018. Absence of Complex I Is  
710 Associated with Diminished Respiratory Chain Function in European Mistletoe. *Current Biology*  
711 **28**, 1614-+.
- 712 **Makrecka-Kuka M, Krumschnabel G, Gnaiger E.** 2015. High-Resolution Respirometry for  
713 Simultaneous Measurement of Oxygen and Hydrogen Peroxide Fluxes in Permeabilized Cells,  
714 Tissue Homogenate and Isolated Mitochondria. *Biomolecules* **5**, 1319-1338.
- 715 **Millar AH, Whelan J, Soole KL, Day DA.** 2011. Organization and Regulation of  
716 Mitochondrial Respiration in Plants. In: Merchant SS, Briggs WR, Ort D, eds. *Annual Review of*  
717 *Plant Biology*, Vol 62, Vol. 62. Palo Alto: Annual Reviews, 79-104.
- 718 **Mower JP, Sloan DB, Alverson AJ.** 2012. Plant Mitochondrial Genome Diversity: The  
719 Genomics Revolution. In: Wendel J, Greilhuber J, Dolezel J, Leitch IJ, eds. *Plant Genome*  
720 *Diversity Volume 1*, Vol. 1: Springer-Verlag Wien.
- 721 **Mower JP, Touzet P, Gummow JS, Delph LF, Palmer JD.** 2007. Extensive variation in  
722 synonymous substitution rates in mitochondrial genes of seed plants. *BMC Evol Biol* **7**:135.
- 723 **Murcha MW, Whelan J.** 2015. Isolation of Intact Mitochondria from the Model Plant Species  
724 *Arabidopsis thaliana* and *Oryza sativa*. In: Whelan J, Murcha MW, eds. *Plant Mitochondria:*  
725 *Methods and Protocols*, Vol. 1305. Totowa: Humana Press Inc, 1-12.
- 726 **Parkinson CL, Mower JP, Qiu YL, Shirk AJ, Song K, Young ND, DePamphilis CW,**  
727 **Palmer JD.** 2005. Multiple major increases and decreases in mitochondrial substitution rates in  
728 the plant family Geraniaceae. *BMC Evol Biol* **5**, 73.
- 729 **Pesta D, Gnaiger E.** 2012. High-resolution respirometry: OXPHOS protocols for human cells  
730 and permeabilized fibers from small biopsies of human muscle. *Methods Mol Biol* **810**, 25-58.
- 731 **R Development Core Team.** 2012. R: A language and environment for statistical computing.  
732 Vienna, Austria.: R Foundation for Statistical Computing.

- 733 **Rice DW, Alverson AJ, Richardson AO, Young GJ, Sanchez-Puerta MV, Munzinger J,**  
734 **Barry K, Boore JL, Zhang Y, dePamphilis CW, Knox EB, Palmer JD.** 2013. Horizontal  
735 Transfer of Entire Genomes via Mitochondrial Fusion in the Angiosperm *Amborella*. *Science*  
736 **342**, 1468-1473.
- 737 **Rockenbach K, Havird JC, Monroe JG, Triant DA, Taylor DR, Sloan DB.** 2016. Positive  
738 selection in rapidly evolving plastid-nuclear enzyme complexes. *Genetics* **204**, 1507-1522.
- 739 **Rossignol R, Faustin B, Rocher C, Malgat M, Mazat JP, Letellier T.** 2003. Mitochondrial  
740 threshold effects. *Biochemical Journal* **370**, 751-762.
- 741 **Sabar M, De Paepe R, de Kouchkovsky Y.** 2000. Complex I impairment, respiratory  
742 compensations, and photosynthetic decrease in nuclear and mitochondrial male sterile mutants of  
743 *Nicotiana glauca*. *Plant Physiology* **124**, 1239-1249.
- 744 **Sanchez-Puerta MV, Garcia LE, Wohlfeiler J, Ceriotti LF.** 2017. Unparalleled replacement  
745 of native mitochondrial genes by foreign homologs in a holoparasitic plant. *New Phytologist*  
746 **214**, 376-387.
- 747 **Schwarzlander M, Logan DC, Johnston IG, Jones NS, Meyer AJ, Fricker MD, Sweetlove**  
748 **LJ.** 2012. Pulsing of Membrane Potential in Individual Mitochondria: A Stress-Induced  
749 Mechanism to Regulate Respiratory Bioenergetics in *Arabidopsis*. *Plant Cell* **24**, 1188-1201.
- 750 **Senkler J, Rugen N, Eubel H, Hegermann J, Braun HP.** 2018. Absence of Complex I  
751 Implicates Rearrangement of the Respiratory Chain in European Mistletoe. *Current Biology* **28**,  
752 1606-+.
- 753 **Sharbrough J, Havird JC, Noe GR, Warren JM, Sloan DB.** 2017. The mitonuclear dimension  
754 of Neanderthal and Denisovan ancestry in modern human genomes. *Genome Biol Evol* **9**, 1567-  
755 1581.
- 756 **Shearman JR, Sonthirod C, Naktang C, Pootakham W, Yoocha T, Sangsrakru D, Jomchai**  
757 **N, Tragoonrung S, Tangphatsornruang S.** 2016. The two chromosomes of the mitochondrial  
758 genome of a sugarcane cultivar: assembly and recombination analysis using long PacBio reads.  
759 *Scientific Reports* **6**.
- 760 **Siedow JN, Girvin ME.** 1980. ALTERNATIVE RESPIRATORY PATHWAY - ITS ROLE IN  
761 SEED RESPIRATION AND ITS INHIBITION BY PROPYL GALLATE. *Plant Physiology* **65**,  
762 669-674.
- 763 **Skippington E, Barkman TJ, Rice DW, Palmer JD.** 2015. Miniaturized mitogenome of the  
764 parasitic plant *Viscum scurruloideum* is extremely divergent and dynamic and has lost all nad  
765 genes. *Proc Natl Acad Sci USA* **112**, E3515-E3524.
- 766 **Skippington E, Barkman TJ, Rice DW, Palmer JD.** 2017. Comparative mitogenomics  
767 indicates respiratory competence in parasitic *Viscum* despite loss of complex I and extreme  
768 sequence divergence, and reveals horizontal gene transfer and remarkable variation in genome  
769 size. *Bmc Plant Biology* **17**, 12.
- 770 **Sloan DB, Alverson AJ, Chuckalovcak JP, Wu M, McCauley DE, Palmer JD, Taylor DR.**  
771 2012a. Rapid evolution of enormous, multichromosomal genomes in flowering plant  
772 mitochondria with exceptionally high mutation rates. *Plos Biology* **10**, e1001241.
- 773 **Sloan DB, Alverson AJ, Wu M, Palmer JD, Taylor DR.** 2012b. Recent acceleration of plastid  
774 sequence and structural evolution coincides with extreme mitochondrial divergence in the  
775 angiosperm genus *Silene*. *Genome Biol Evol* **4**, 294-306.
- 776 **Sloan DB, Havird JC, Sharbrough J.** 2017. The on-again, off-again relationship between  
777 mitochondrial genomes and species boundaries. *Molecular Ecology* **26**, 2212-2236.



- 778 **Sloan DB, Oxelman B, Rautenberg A, Taylor DR.** 2009. Phylogenetic analysis of  
779 mitochondrial substitution rate variation in the angiosperm tribe Sileneae. *BMC Evol Biol* **9**,  
780 260.
- 781 **Sloan DB, Triant DA, Wu M, Taylor DR.** 2014. Cytonuclear interactions and relaxed selection  
782 accelerate sequence evolution in organelle ribosomes. *Mol Biol Evol* **31**, 673-682.
- 783 **Stadler T, Delph LF.** 2002. Ancient mitochondrial haplotypes and evidence for intragenic  
784 recombination in a gynodioecious plant. *Proceedings of the National Academy of Sciences of the*  
785 *United States of America* **99**, 11730-11735.
- 786 **Storrie B, Madden EA.** 1990. ISOLATION OF SUBCELLULAR ORGANELLES. *Methods in*  
787 *Enzymology* **182**, 203-225.
- 788 **Sumbalova Z, Vancova O, Krumschnabel G, Gnaiger E.** 2014a. Optimization of malate  
789 concentration for  
790 high-resolution respirometry: mitochondria from rat liver and brain. *Mitochondr Physiol*  
791 *Network* **19**, 37.
- 792 **Sumbalova Z, Vancova O, Krumschnabel G, Gnaiger E.** 2014b. Optimization of malate  
793 concentration for high-resolution respirometry: mitochondria from rat liver and brain.  
794 *Mitochondr Physiol Network* **19**, 37.
- 795 **Touzet P, Delph LF.** 2009. The Effect of Breeding System on Polymorphism in Mitochondrial  
796 Genes of *Silene*. *Genetics* **181**, 631-644.
- 797 **Van Gestel K, Verbelen JP.** 2002. Giant mitochondria are a response to low oxygen pressure in  
798 cells of tobacco (*Nicotiana tabacum* L.). *Journal of Experimental Botany* **53**, 1215-1218.
- 799 **Vanlerberghe GC.** 2013. Alternative Oxidase: A Mitochondrial Respiratory Pathway to  
800 Maintain Metabolic and Signaling Homeostasis during Abiotic and Biotic Stress in Plants.  
801 *International Journal of Molecular Sciences* **14**, 6805-6847.
- 802 **Watanabe CK, Hachiya T, Terashima I, Noguchi K.** 2008. The lack of alternative oxidase at  
803 low temperature leads to a disruption of the balance in carbon and nitrogen metabolism, and to  
804 an up-regulation of antioxidant defence systems in *Arabidopsis thaliana* leaves. *Plant Cell and*  
805 *Environment* **31**, 1190-1202.
- 806 **Wilson DF, Rumsey WL, Green TJ, Vanderkooi JM.** 1988. THE OXYGEN DEPENDENCE  
807 OF MITOCHONDRIAL OXIDATIVE-PHOSPHORYLATION MEASURED BY A NEW  
808 OPTICAL METHOD FOR MEASURING OXYGEN CONCENTRATION. *Journal of*  
809 *Biological Chemistry* **263**, 2712-2718.
- 810 **Wolfe KH, Li WH, Sharp PM.** 1987. Rates of nucleotide substitution vary greatly among plant  
811 mitochondrial, chloroplast, and nuclear DNAs. *Proc Natl Acad Sci USA* **84**, 9054-9058.
- 812 **Wu ZQ, Cuthbert JM, Taylor DR, Sloan DB.** 2015. The massive mitochondrial genome of the  
813 angiosperm *Silene noctiflora* is evolving by gain or loss of entire chromosomes. *Proc Natl Acad*  
814 *Sci U S A* **112**, 10185-10191.

815

Table 1. High resolution respirometry titration protocol and associated oxygen flux states generated in mitochondrial respiration experiments.

| Step (Fig. 1) | Titration (mM)                                                                                      | Abbr ev.         | Site(s) of electron entry                          | Explanation                                                                                                                                                                                                                            |
|---------------|-----------------------------------------------------------------------------------------------------|------------------|----------------------------------------------------|----------------------------------------------------------------------------------------------------------------------------------------------------------------------------------------------------------------------------------------|
| A             | Malate (0.5)<br>Pyruvate (10)<br>Glutamate (10)<br>CoA (0.012)<br>TPP (0.2)<br>NAD <sup>+</sup> (2) | Sb+C<br>f        | CI + DH <sub>in</sub>                              | LEAK-associated (non-coupled) respiration supported by saturating concentrations of substrates and cofactors for electron supply to Complex I and internal NADH dehydrogenases in the absence of ADP. Electron acceptors: CIV and AOX. |
| B             | ADP (3)                                                                                             | ADP              | CI + DH <sub>in</sub>                              | OXPHOS-associated respiration supported by electrons from Complex I and internal NADH dehydrogenases. Electron acceptors: CIV and AOX.                                                                                                 |
| C             | NADH (1)                                                                                            | NAD<br>H         | CI + DH <sub>in</sub> +<br>DH <sub>ex</sub>        | OXPHOS-associated respiration supported by electrons from all NADH dehydrogenases. Electron acceptors: CIV and AOX.                                                                                                                    |
| D             | Succinate (40)                                                                                      | SUC<br>C         | CII + CI +<br>DH <sub>in</sub> + DH <sub>ex</sub>  | Maximal OXPHOS-associated respiration supported by electrons from CII and all NADH dehydrogenases. Electron acceptors: CIV and AOX.                                                                                                    |
| E             | Rotenone (0.01)                                                                                     | ROT              | CII + DH <sub>in</sub> +<br>DH <sub>ex</sub>       | OXPHOS-associated respiration supported by electrons from CII and rotenone-insensitive NADH dehydrogenases (excluding CI). Electron acceptors: CIV and AOX.                                                                            |
| F             | <i>n</i> -propyl gallate (0.5)                                                                      | nPG              | CII + DH <sub>in</sub> +<br>DH <sub>ex</sub>       | OXPHOS-associated respiration supported by electrons from CII and rotenone-insensitive NADH dehydrogenases. Electron acceptor: CIV                                                                                                     |
| G             | Ascorbate (10)<br>TMPD (0.3)                                                                        | ASC/<br>TMP<br>D | CIV + CII +<br>DH <sub>in</sub> + DH <sub>ex</sub> | Maximal capacity of CIV-mediated respiration supported by artificial electron donors. Electron acceptor: CIV                                                                                                                           |

Abbreviations not listed above: ADP, adenosine diphosphate; CIV, Complex IV or cytochrome *c* oxidase; CoA, coenzyme-A; OXPHOS, oxidative phosphorylation; nPG, *n*-propyl gallate, an inhibitor of the alternative oxidase (AOX); Sb+Cf, substrates and cofactors supporting mitochondrial NADH production; TMPD, tetramethylphenylenediamine; TPP, thiamine pyrophosphate.

Table 2. Respiratory flux control factors

| Flux control factor           | Calculation* | Explanation                                                                                                                                                                                                           |
|-------------------------------|--------------|-----------------------------------------------------------------------------------------------------------------------------------------------------------------------------------------------------------------------|
| OXPHOS coupling efficiency    | $1-(A/B)$    | Extent of ADP control over respiration, relating to the coupling efficiency of oxidative phosphorylation ranging from zero (completely non-coupled or no ADP control) to 1.0 (maximally coupled or 100% ADP control). |
| DH <sub>ex</sub> flux control | $1-(B/C)$    | Proportion of total NADH-supported OXPHOS-linked respiration contributed by external NADH dehydrogenases.                                                                                                             |
| CI flux control               | $1-(E/D)$    | Proportion of maximal (NADH + Succinate-supported) OXPHOS-linked respiration contributed by CI.                                                                                                                       |
| CII flux control              | $1-(C/D)$    | Proportion of maximal (NADH + Succinate-supported) OXPHOS-linked respiration contributed by CII.                                                                                                                      |
| AOX flux control              | $1-(F/E)$    | Proportion of OXPHOS-linked respiration mediated by the alternative oxidase (AOX).                                                                                                                                    |
| Excess capacity of CIV        | $(G/F)-1$    | Apparent excess respiratory capacity of cytochrome c oxidase over OXPHOS-linked respiration supported by CII and rotenone-insensitive NADH dehydrogenases.                                                            |

\*Calculations refer to recorded rates of O<sub>2</sub> flux at corresponding steps A-F in Table 1 and Fig. 1.

## Figure legends

Fig. 1. The plant mitochondrial electron transport system (A) and our protocol for quantifying mitochondrial respiration in seven different states (B). A) OXPHOS complexes are presented as structures from eukaryotic model species (PDB accessions 5LNK, 1ZOY, 1BGY, 1V54, 5ARA, 3VV9, and 4G6H). Residues are colored according to genomic identity in *S. conica*: nuclear-encoded residues are yellow, mt-encoded residues are green, and inter-genomic contact residues are in red (see Sharbrough *et al.*, 2017 for details on identifying contact residues). Electron and proton flow are represented by blue and black dashed lines, respectively. Substrates added in our protocol are in green while inhibitors are red. B) Data were taken from a single sample that showed representative responses, although reoxygenation events and other details were removed to enhance clarity (a typical experiment lasted ~2 hours). Black arrows indicate the addition of substrates/inhibitors: mt: mitochondrial isolate; sb+cof: the substrates and cofactors NAD<sup>+</sup>, TPP, CoA, malate, pyruvate, and glutamate; see main text for other abbreviations and details. Letters above the graph correspond to steps A-G in Table 1.

Fig. 2. Fraction of seeds that germinated and metrics of plant fitness for the four accessions of *S. conica* and the single accession of *S. subconica* investigated: A) Percent seeds germinated, B) maximal rosette diameter, C) maximal height, D) number of stems, E) number of capsules, and F) total mass of seeds produced. Lowercase letters indicate significant groupings among accessions at  $P < 0.05$  based on Tukey post-hoc tests.  $n = 7-15$  for A) – D) and  $n = 5-13$  for E) and F). Error bars show SEM.

Fig. 3. Respiration in isolated mitochondria of *Silene* during seven unique respiratory states. The seven respiratory states and their abbreviations follow steps A-G in Fig. 1B and Table 1. A) All accessions are pooled and respiration is normalized to mt protein input. B) Variation in protein-normalized respiration among accessions. C) Respiration normalized to COX activity. Lowercase letters indicate significant groupings among states at  $P < 0.05$  based on Tukey post-hoc tests. There were no significant differences among accessions in B) or C). Error bars show SEM.  $n = 48$  for A) and  $n = 7-15$  for B) and C).

Fig. 4. Variability in flux control factors (FCFs) among *Silene* accessions. See Table 2 for a description of FCFs. Lowercase letters indicate significant groupings among accessions at  $P < 0.05$  based on Tukey post-hoc tests. Error bars show SEM.  $n = 7-15$ .

Fig. 5. Correlation matrix between different flux control factors (see Table 2).  $P$  values are based on general linear models.

Fig. 6. Epifluorescence micrographs of mitochondria in epidermal cells in intact roots of A) *Silene noctiflora* or B) *S. vulgaris* stained with TMRM. Each still image is taken from the respective Supplemental Videos S1 and S2. Bar = 5  $\mu\text{m}$ .

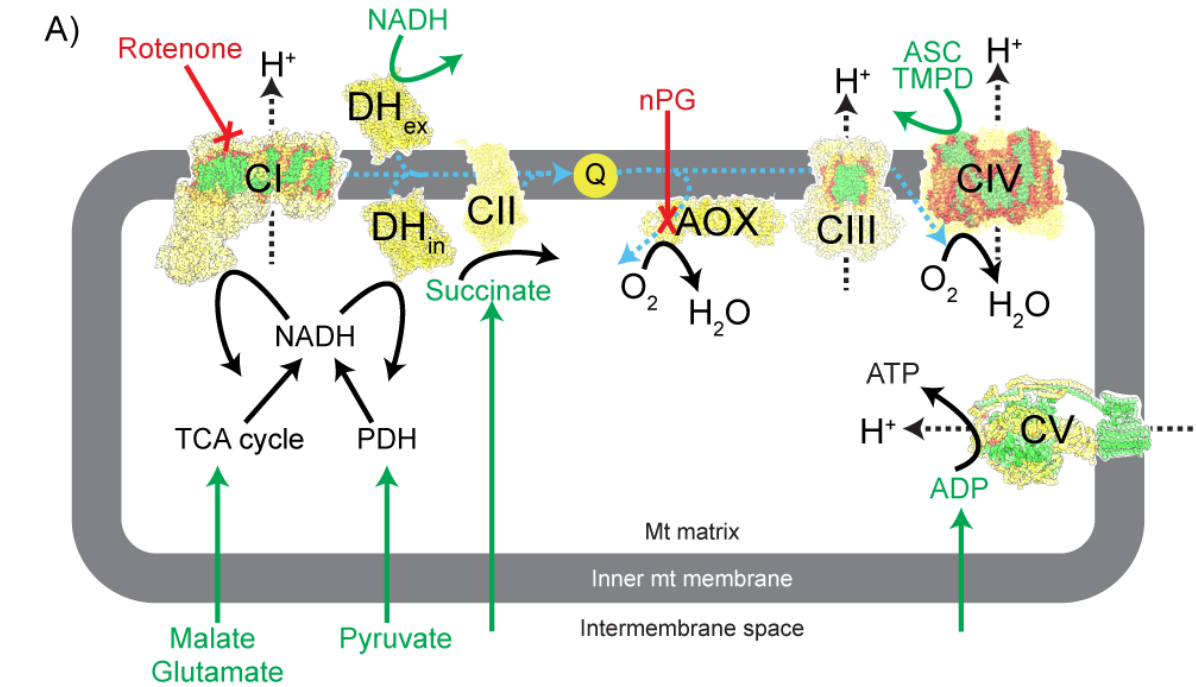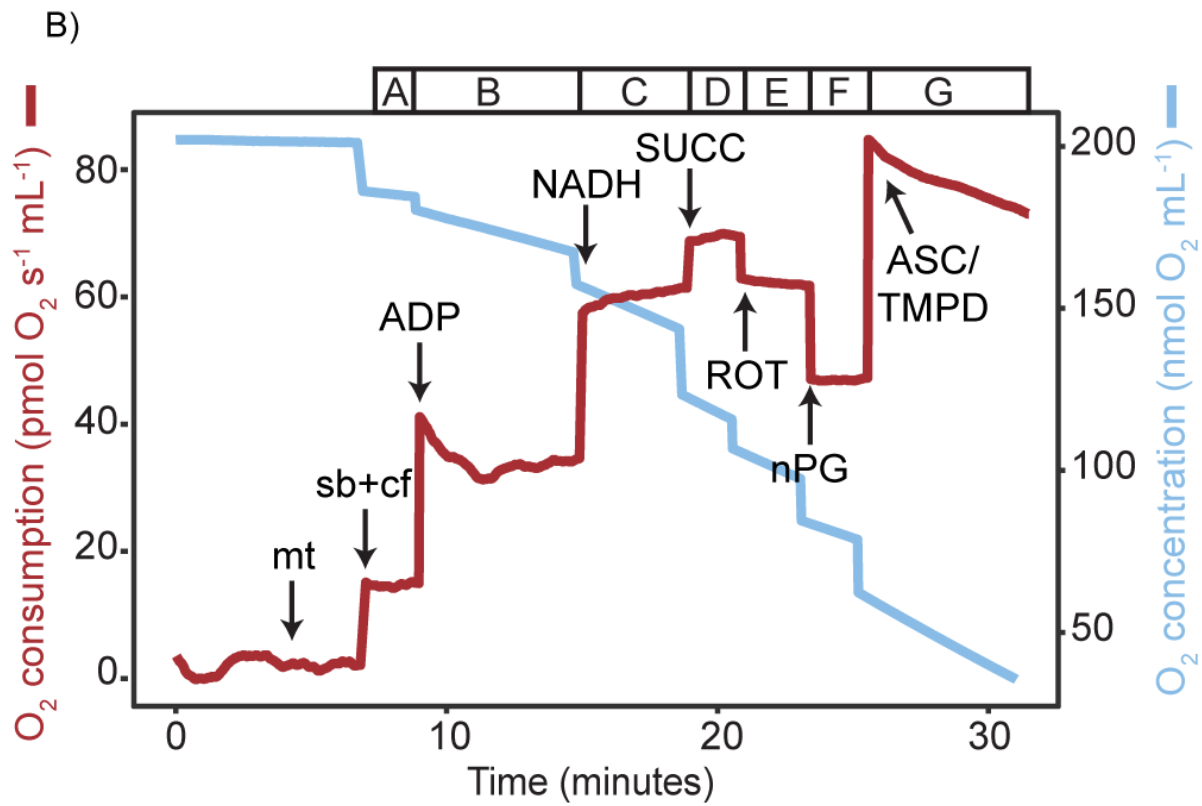

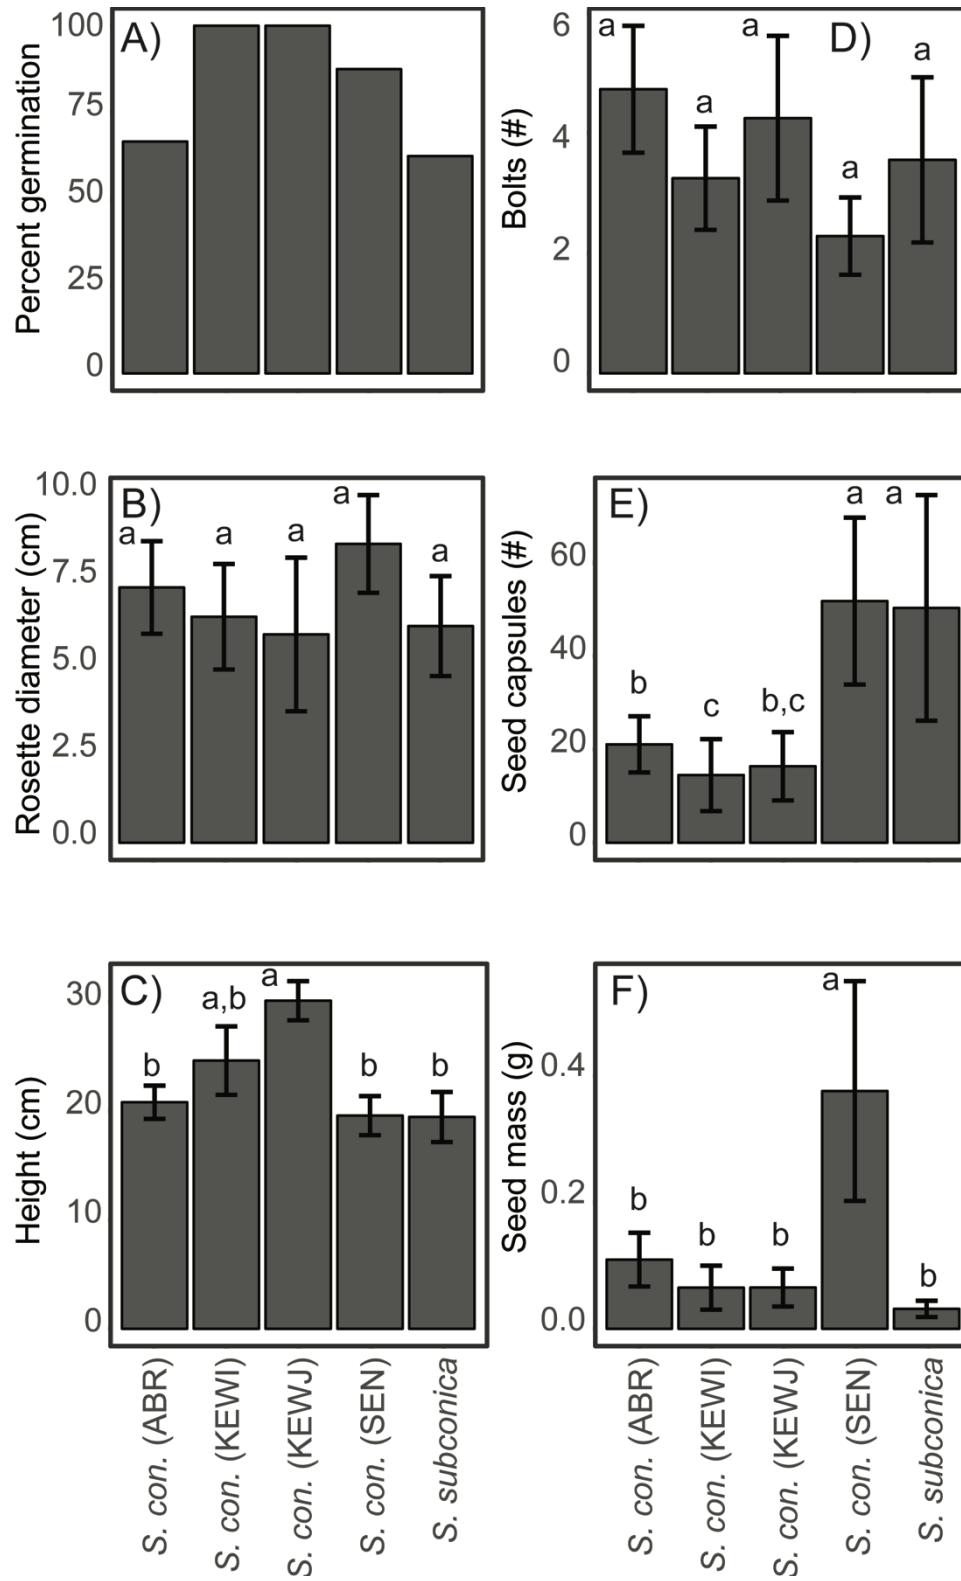

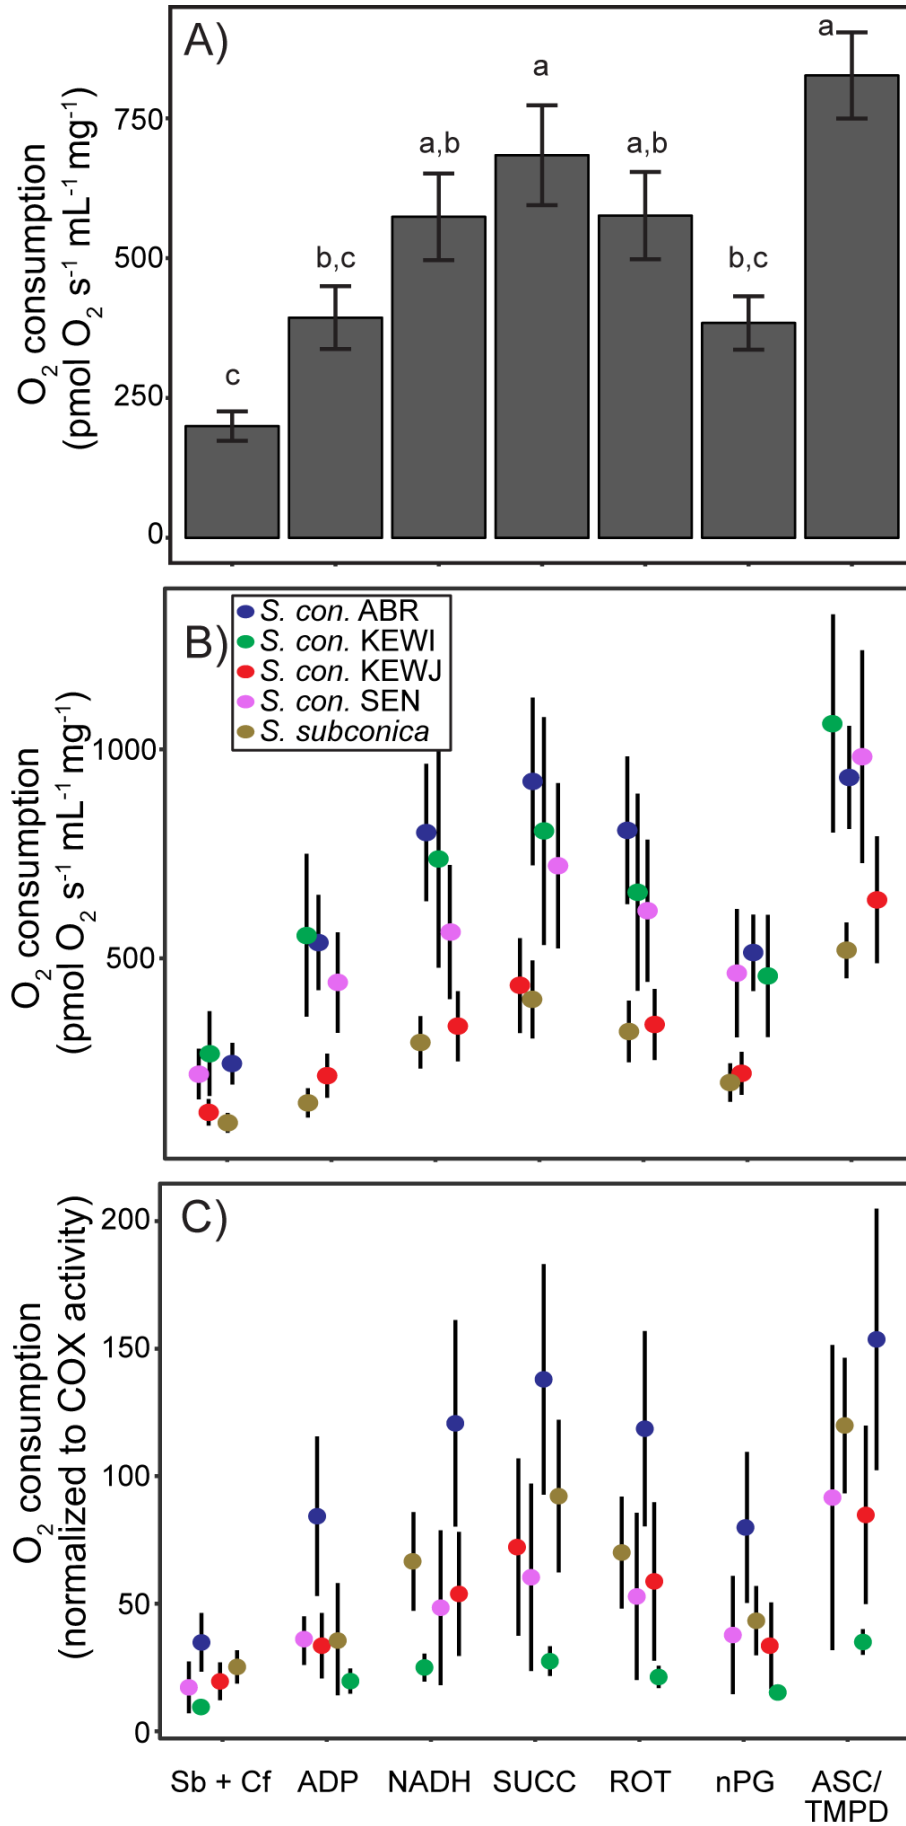

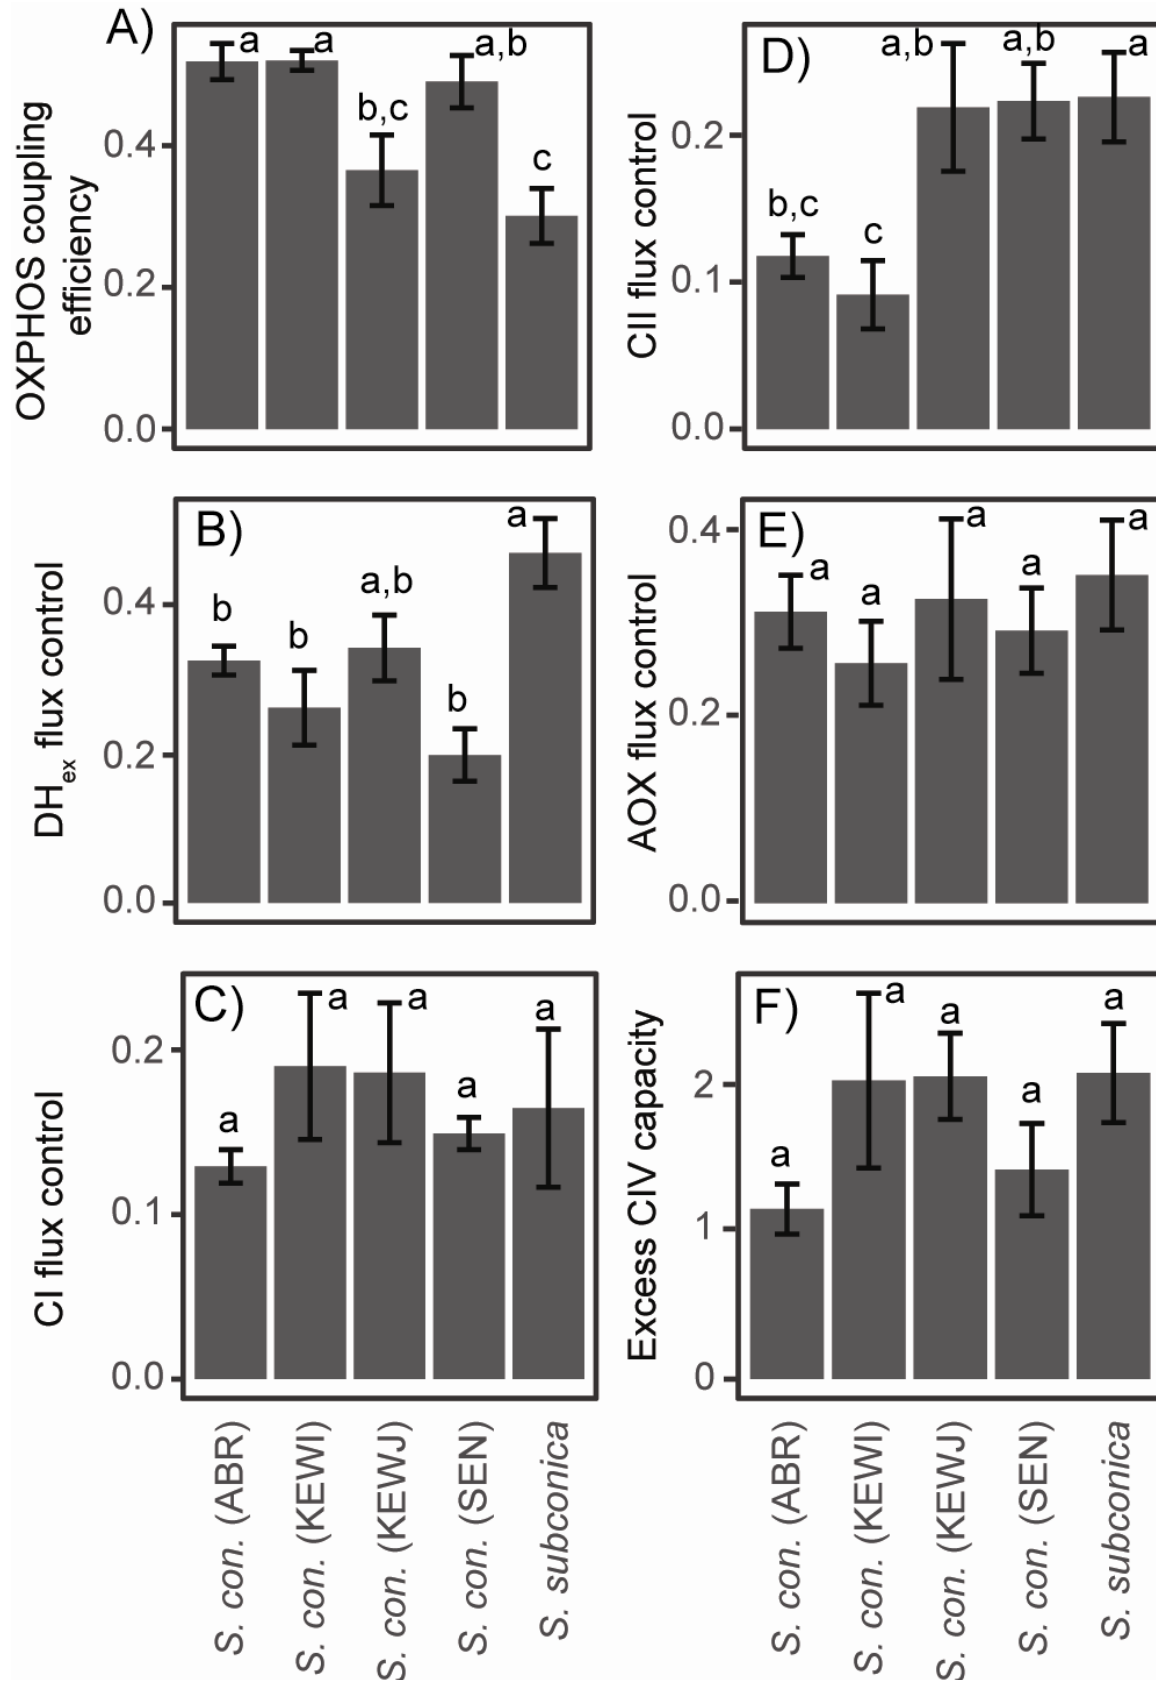



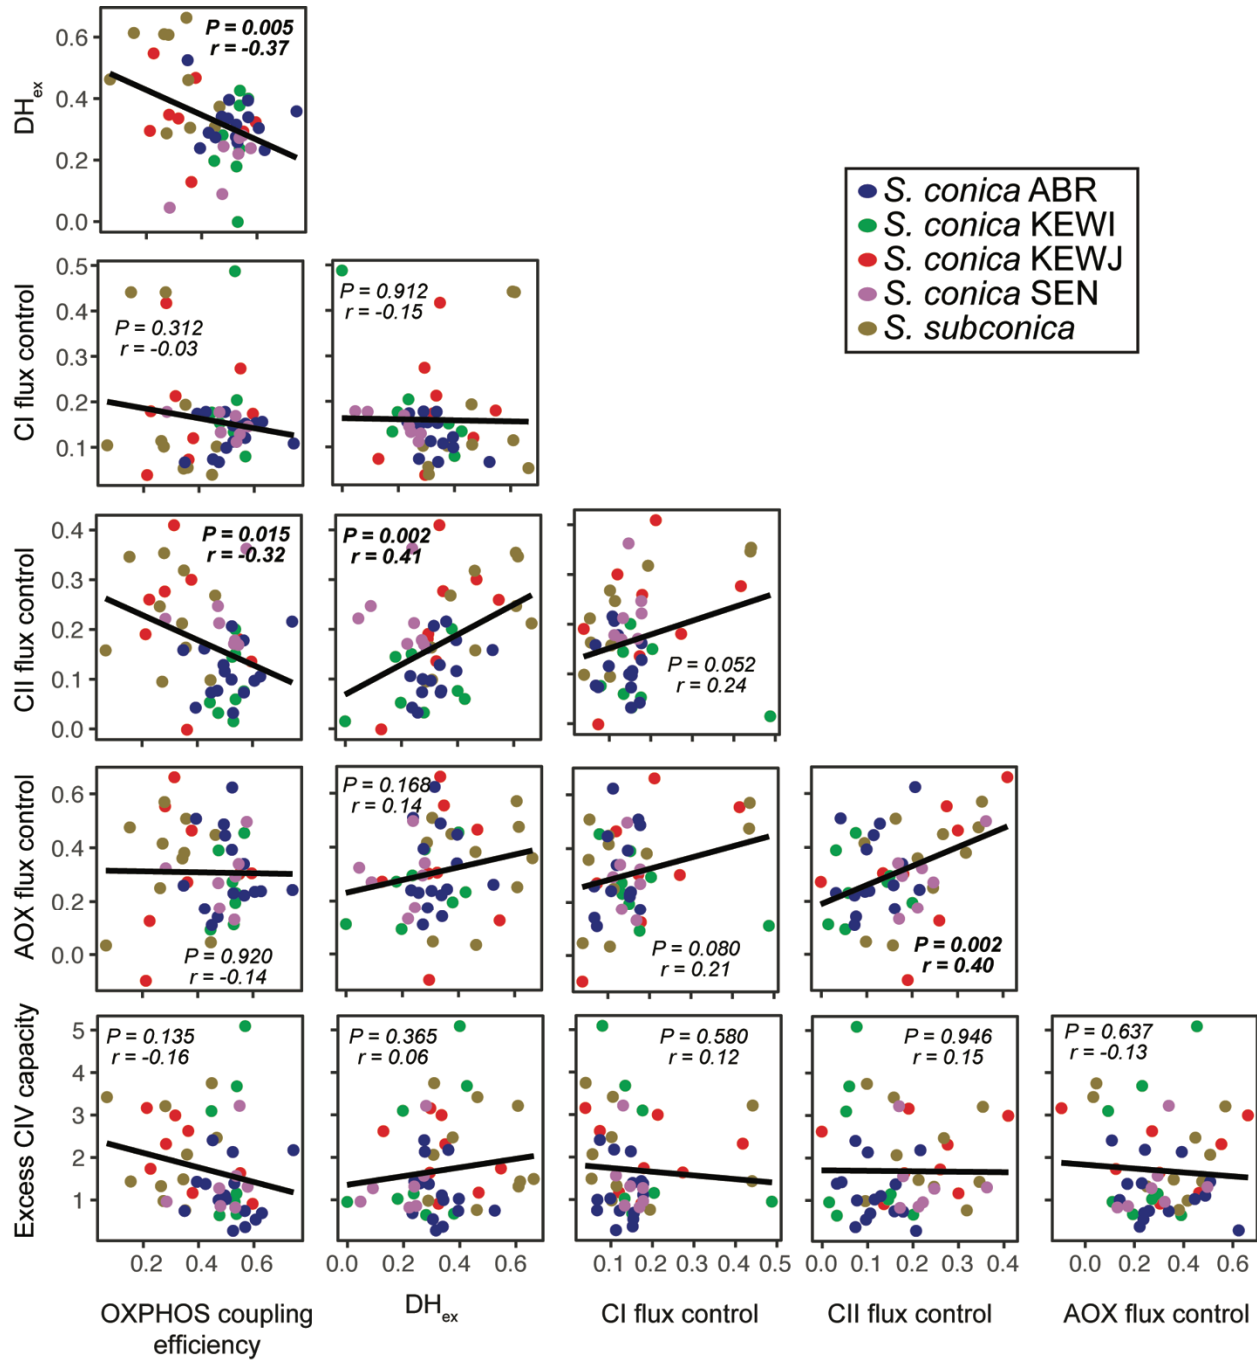

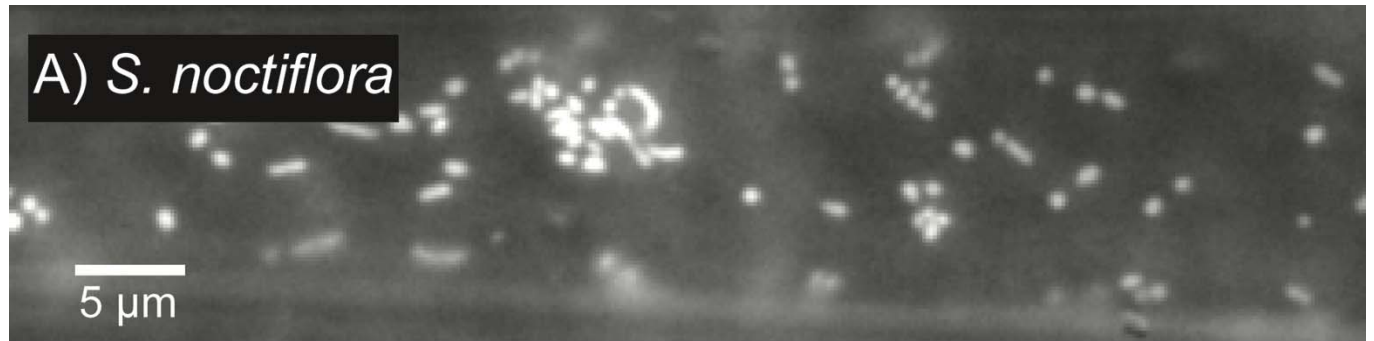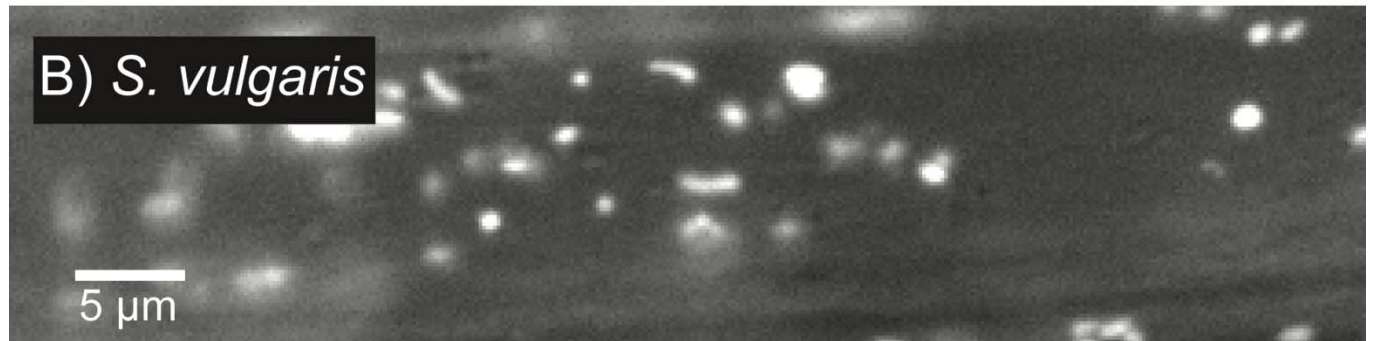

Source: https://www.biorxiv.org/content/10.1101/448902v1.full.pdf
